# Supplementary material for: Weight-for-age distributions among children with HIV on antiretroviral therapy in the International epidemiology Databases to Evaluate AIDS (IeDEA) multiregional consortium
Source: BMC Res Notes. 2020 May 24;13:249. doi: 10.1186/s13104-020-05081-7 (PMC7245795; doi:10.1186/s13104-020-05081-7)
Supplement: Supplementary file 1 — Additional file 1. Weight-for-age distributions among CHIV on ART in the International Epidemiology to evaluate AIDS (IeDEA) multiregional consortium - complete tables. [file 13104_2020_5081_MOESM1_ESM.xlsx]

## Sheet: Summary of the tables
Weight-for-age distributions among children with HIV on antiretroviral therapy in the International Epidemiology to evaluate AIDS (IeDEA) multiregional consortium
Summary of the tables
1-Overall population
2-By sex
3-By regions, boys
4-By regions, girls
5-By ART duration and sex
6-By year of visit and sex
7- Regions, ART duration, boys
8-Regions, ART duration, girls
9-Regions, ART duration, <2013,Boys
10-Regions, ART duration, <2013,Girls
11-Regions, ART duration, >=2013,Boys
12-Regions, ART duration, >=2013,Girls

## Sheet: 1-Overall population
Weight-for-age distributions among children with HIV on antiretroviral therapy in the International Epidemiology to evaluate AIDS (IeDEA) multiregional consortium
Total population
Weight Bands	Age (years)
	0.25	0.75	1	2	3	4	5	6	7	8	9	10	11	12	13	14	15
00-03	1.249	0.014	0.005	0	0	0	0	0	0	0	0	0	0	0	0	0	0
03-06	43.97	15.39	3.354	0.306	0.055	0.023	0	0	0	0	0	0	0	0	0	0	0
06-10	52.856	76.852	58.14	17.327	3.284	0.791	0.282	0.089	0.024	0.004	0	0	0	0	0	0	0
10-14	1.925	7.744	36.813	69.831	52.761	25.275	10.37	4.256	1.785	0.753	0.28	0.22	0.131	0.145	0.102	0.088	0.032
14-20	0	0	1.682	12.318	43.045	70.095	76.458	63.242	41.086	21.992	10.325	4.483	2	1.108	0.632	0.465	0.317
20-25	0	0	0.005	0.216	0.72	3.488	11.933	29.382	47.898	54.316	46.351	30.845	17.922	9.351	4.911	2.544	1.36
25-30	0	0	0	0.002	0.128	0.283	0.789	2.552	7.986	19.428	33.385	41.791	38.862	29.033	17.917	10.45	5.866
30-35	0	0	0	0	0.008	0.039	0.111	0.333	0.853	2.676	7.447	16.676	26.405	30.792	28.93	21.366	14.52
35-40	0	0	0	0	0	0.005	0.05	0.111	0.243	0.539	1.495	4.108	9.647	17.033	21.644	22.833	18.976
40-45	0	0	0	0	0	0	0.007	0.024	0.062	0.153	0.391	1.151	3.126	7.57	13.623	19.116	20.89
45-50	0	0	0	0	0	0	0	0.01	0.033	0.06	0.138	0.362	1.157	2.853	6.86	12.108	17.383
50-55	0	0	0	0	0	0	0	0	0.024	0.048	0.082	0.137	0.367	1.233	3.045	6.204	11.187
55-60	0	0	0	0	0	0	0	0	0.006	0.021	0.051	0.091	0.166	0.465	1.33	2.734	5.341
60+	0	0	0	0	0	0	0	0	0	0.009	0.054	0.136	0.216	0.417	1.006	2.092	4.128

## Sheet: 2-By sex
Weight-for-age distributions among children with HIV on antiretroviral therapy in the International Epidemiology to evaluate AIDS (IeDEA) multiregional consortium
Boys - total
Weight Bands	Age (years)
	0.25	0.75	1	2	3	4	5	6	7	8	9	10	11	12	13	14	15
00-03	1.029	0.028	0	0	0	0	0	0	0	0	0	0	0	0	0	0	0
03-06	40.403	13.02	2.783	0.292	0.021	0.013	0	0	0	0	0	0	0	0	0	0	0
06-10	55.844	77.778	54.134	14.926	2.702	0.706	0.251	0.056	0	0	0	0	0	0	0	0	0
10-14	2.724	9.174	41.096	69.703	48.974	22.369	8.94	3.514	1.437	0.589	0.232	0.222	0.133	0.112	0.148	0.088	0.033
14-20	0	0	1.976	14.846	47.473	72.577	76.439	61.465	39.18	20.047	9.155	4.328	2.015	1.234	0.641	0.573	0.386
20-25	0	0	0.01	0.233	0.695	3.975	13.351	31.628	49.521	55.249	46.544	30.485	18.679	10.502	5.967	3.306	1.796
25-30	0	0	0	0	0.136	0.331	0.847	2.794	8.65	20.675	34.73	43.902	42.407	33.264	21.418	13.45	7.993
30-35	0	0	0	0	0	0.029	0.133	0.393	0.827	2.66	7.422	16.387	26.234	33.233	34.623	26.571	19.027
35-40	0	0	0	0	0	0	0.039	0.138	0.277	0.517	1.29	3.289	7.68	14.467	20.806	24.61	21.694
40-45	0	0	0	0	0	0	0	0.012	0.051	0.165	0.34	0.777	1.63	4.711	9.329	16.108	19.315
45-50	0	0	0	0	0	0	0	0	0.037	0.049	0.129	0.287	0.65	1.334	4.072	8.19	14.515
50-55	0	0	0	0	0	0	0	0	0.021	0.026	0.062	0.15	0.289	0.571	1.529	4.099	8.445
55-60	0	0	0	0	0	0	0	0	0	0.021	0.036	0.065	0.133	0.304	0.787	1.61	4.007
60+	0	0	0	0	0	0	0	0	0	0.002	0.06	0.107	0.149	0.267	0.679	1.395	2.79
Girls - total
Weight Bands	Age (years)
	0.25	0.75	1	2	3	4	5	6	7	8	9	10	11	12	13	14	15
00-03	1.45	0	0.01	0	0	0	0	0	0	0	0	0	0	0	0	0	0
03-06	47.228	17.665	3.921	0.321	0.091	0.034	0	0	0	0	0	0	0	0	0	0	0
06-10	50.127	75.964	62.114	19.88	3.904	0.881	0.315	0.123	0.048	0.007	0	0	0	0	0	0	0
10-14	1.195	6.371	32.565	69.966	56.795	28.381	11.887	5.035	2.146	0.921	0.329	0.217	0.13	0.178	0.058	0.087	0.031
14-20	0	0	1.39	9.63	38.328	67.443	76.477	65.108	43.06	23.99	11.517	4.638	1.986	0.984	0.624	0.362	0.252
20-25	0	0	0	0.199	0.746	2.968	10.43	27.026	46.218	53.359	46.154	31.204	17.168	8.219	3.893	1.823	0.954
25-30	0	0	0	0.004	0.12	0.233	0.727	2.299	7.298	18.147	32.015	39.685	35.326	24.874	14.544	7.609	3.89
30-35	0	0	0	0	0.016	0.05	0.087	0.27	0.88	2.693	7.473	16.964	26.575	28.392	23.444	16.438	10.333
35-40	0	0	0	0	0	0.011	0.061	0.084	0.208	0.562	1.705	4.924	11.608	19.555	22.452	21.15	16.452
40-45	0	0	0	0	0	0	0.015	0.037	0.074	0.14	0.444	1.525	4.618	10.38	17.761	21.965	22.354
45-50	0	0	0	0	0	0	0	0.02	0.029	0.071	0.146	0.436	1.663	4.346	9.546	15.818	20.048
50-55	0	0	0	0	0	0	0	0	0.026	0.071	0.102	0.125	0.445	1.884	4.505	8.199	13.734
55-60	0	0	0	0	0	0	0	0	0.012	0.021	0.066	0.117	0.199	0.623	1.854	3.798	6.581
60+	0	0	0	0	0	0	0	0	0	0.017	0.049	0.164	0.283	0.564	1.321	2.752	5.371

## Sheet: 3-By regions, boys
Weight-for-age distributions among children with HIV on antiretroviral therapy in the International Epidemiology to evaluate AIDS (IeDEA) multiregional consortium
Boys - Asia-Pacific
Weight Bands	Age (years)
	0.25	0.75	1	2	3	4	5	6	7	8	9	10	11	12	13	14	15
00-03	0	0	0	0	0	0	0	0	0	0	0	0	0	0	0	0	0
03-06	37.551	5.056	1.974	0.057	0	0	0	0	0	0	0	0	0	0	0	0	0
06-10	59.592	84.831	48.966	10.607	2.148	0.623	0.358	0	0	0	0	0	0	0	0	0	0
10-14	2.857	10.112	48.026	73.398	54.069	28.184	11.368	5.755	2.508	0.315	0.205	0.109	0	0.035	0	0	0
14-20	0	0	1.034	15.882	42.916	66.615	74.071	68.186	51.027	32.583	15.75	7.092	2.163	0.596	0.329	0	0
20-25	0	0	0	0.057	0.826	4.111	12.497	20.653	36.312	48.366	54.181	43.672	26.735	12.877	4.48	1.318	0.325
25-30	0	0	0	0	0.041	0.467	1.486	4.16	7.621	12.83	19.637	32.433	41.394	37.333	23.469	8.834	2.602
30-35	0	0	0	0	0	0	0.22	1.146	1.887	3.946	5.932	9.793	16.431	25.509	29.47	20.595	9.239
35-40	0	0	0	0	0	0	0	0.1	0.597	1.259	2.378	3.382	6.969	11.263	18.331	24.256	18.933
40-45	0	0	0	0	0	0	0	0	0.048	0.629	1.406	2.046	2.884	6.351	11.508	20.498	24.593
45-50	0	0	0	0	0	0	0	0	0	0.073	0.332	0.764	1.953	2.947	4.562	11.957	22.056
50-55	0	0	0	0	0	0	0	0	0	0	0.153	0.546	0.871	1.544	3.494	5.857	9.629
55-60	0	0	0	0	0	0	0	0	0	0	0.026	0.136	0.391	0.877	2.302	2.196	5.986
60+	0	0	0	0	0	0	0	0	0	0	0	0.027	0.21	0.667	2.055	4.49	6.636
Boys - CCASANet
Weight Bands	Age (years)
	0.25	0.75	1	2	3	4	5	6	7	8	9	10	11	12	13	14	15
00-03	1.333	0	0	0	0	0	0	0	0	0	0	0	0	0	0	0	0
03-06	50.222	15.301	2.649	0.318	0	0	0	0	0	0	0	0	0	0	0	0	0
06-10	48.444	82.514	53.863	8.115	0.814	0.656	0.054	0.052	0	0	0	0	0	0	0	0	0
10-14	0	2.186	42.053	74.304	42.382	15.206	5.141	0.518	0.151	0.196	0.049	0.144	0	0.161	0	0.061	0
14-20	0	0	1.435	17.263	56.213	81.157	77.219	52.277	28.319	12.958	4.847	2.883	1.968	1.183	0.278	0.67	0.549
20-25	0	0	0	0	0.592	2.922	16.504	42.081	56.133	52.714	37.636	23.258	12.74	7.527	7.397	4.875	3.365
25-30	0	0	0	0	0	0.06	1.082	4.193	13.024	28.215	41.345	40.846	33.743	23.172	15.295	8.41	5.975
30-35	0	0	0	0	0	0	0	0.621	1.464	3.032	10.93	22.057	34.383	31.559	28.42	18.038	13.324
35-40	0	0	0	0	0	0	0	0.259	0.808	1.418	2.621	6.055	10.182	21.237	22.581	22.364	15.041
40-45	0	0	0	0	0	0	0	0	0.101	1.125	1.385	2.018	2.951	8.817	12.236	21.633	17.308
45-50	0	0	0	0	0	0	0	0	0	0.244	0.841	1.442	1.918	2.742	6.396	11.944	20.398
50-55	0	0	0	0	0	0	0	0	0	0.098	0.198	0.529	1.082	1.344	2.836	5.058	12.569
55-60	0	0	0	0	0	0	0	0	0	0	0.148	0.336	0.59	1.29	2.113	3.473	5.563
60+	0	0	0	0	0	0	0	0	0	0	0	0.432	0.443	0.968	2.447	3.473	5.907
Boys - West Africa
Weight Bands	Age (years)
	0.25	0.75	1	2	3	4	5	6	7	8	9	10	11	12	13	14	15
00-03	0	0	0	0	0	0	0	0	0	0	0	0	0	0	0	0	0
03-06	52.941	25.806	5.599	0.257	0.042	0	0	0	0	0	0	0	0	0	0	0	0
06-10	41.176	66.667	59.306	20.637	3.273	0.915	0.361	0.03	0	0	0	0	0	0	0	0	0
10-14	5.882	7.527	33.991	68.07	53.756	23.874	9.288	3.907	1.346	1.087	0.427	0.448	0.177	0.166	0.194	0.73	0
14-20	0	0	1.025	10.986	42.258	71.549	78.7	65.314	41.609	18.86	8.364	4.484	1.559	1.165	1.311	0.973	0.9
20-25	0	0	0.079	0.051	0.546	3.149	10.699	28.374	49.284	59.195	49.451	31.102	18.604	10.566	4.808	2.981	1.95
25-30	0	0	0	0	0.126	0.513	0.656	1.954	6.73	18.067	34.28	43.626	43.161	33.694	24.186	14.477	6.902
30-35	0	0	0	0	0	0	0.295	0.301	0.802	1.968	5.8	15.887	25.797	34.11	33.074	26.642	24.681
35-40	0	0	0	0	0	0	0	0.12	0.2	0.734	1.19	2.979	7.548	13.394	20.155	24.513	17.929
40-45	0	0	0	0	0	0	0	0	0	0.059	0.275	0.833	1.914	4.326	9.471	15.146	20.03
45-50	0	0	0	0	0	0	0	0	0.029	0	0.153	0.416	0.78	1.581	4.031	7.725	13.203
50-55	0	0	0	0	0	0	0	0	0	0.029	0.031	0.224	0.39	0.832	1.554	3.954	8.177
55-60	0	0	0	0	0	0	0	0	0	0	0	0	0.035	0.083	1.02	1.825	3.976
60+	0	0	0	0	0	0	0	0	0	0	0.031	0	0.035	0.083	0.194	1.034	2.251
Boys - Central Africa
Weight Bands	Age (years)
	0.25	0.75	1	2	3	4	5	6	7	8	9	10	11	12	13	14	15
00-03	0	0	0	0	0	0	0	0	0	0	0	0	0	0	0	0	0
03-06	0	0	0	0	0	0	0	0	0	0	0	0	0	0	0	0	0
06-10	0	0	0	0	0	0	0	0	0	0	0	0	0	0	0	0	0
10-14	0	0	97.727	83.072	51.802	19.245	7.1	5.077	1.094	0.343	0.142	0	0	0.05	0.052	0.112	0
14-20	0	0	2.273	16.816	47.597	76.927	77.9	59.487	36.094	16.225	7.565	3.168	0.962	1.253	0.464	0.503	0.059
20-25	0	0	0	0.112	0.601	3.828	14.6	32.763	53.177	56.569	43.121	28.416	16.073	8.571	4.794	2.624	2.245
25-30	0	0	0	0	0	0	0.4	2.619	9.01	24.265	41.608	46.714	41.578	30.727	16.546	9.436	6.084
30-35	0	0	0	0	0	0	0	0.053	0.521	2.108	6.809	19.149	30.991	37.794	35.979	21.496	13.999
35-40	0	0	0	0	0	0	0	0	0.052	0.245	0.709	2.27	9.192	16.541	26.649	28.922	21.087
40-45	0	0	0	0	0	0	0	0	0.052	0	0.047	0.142	0.674	3.659	9.845	20.994	19.846
45-50	0	0	0	0	0	0	0	0	0	0	0	0.095	0.529	0.902	3.557	10.106	19.256
50-55	0	0	0	0	0	0	0	0	0	0	0	0.047	0	0.351	0.876	4.411	10.927
55-60	0	0	0	0	0	0	0	0	0	0.245	0	0	0	0.15	0.825	0.782	4.548
60+	0	0	0	0	0	0	0	0	0	0	0	0	0	0	0.412	0.614	1.949
Boys - East Africa
Weight Bands	Age (years)
	0.25	0.75	1	2	3	4	5	6	7	8	9	10	11	12	13	14	15
00-03	0.468	0	0	0	0	0	0	0	0	0	0	0	0	0	0	0	0
03-06	25.741	15.166	4.03	0.612	0.043	0.039	0	0	0	0	0	0	0	0	0	0	0
06-10	70.671	75.671	55.936	18.404	4.134	1.031	0.394	0.083	0	0	0	0	0	0	0	0	0
10-14	3.12	9.163	37.53	66.104	47.652	23.384	9.642	3.87	1.562	0.915	0.25	0.3	0.136	0.165	0.236	0.09	0.036
14-20	0	0	2.505	14.548	47.229	70.97	77.728	63.02	41.638	22.743	10.92	4.971	2.65	1.661	0.643	0.843	0.65
20-25	0	0	0	0.332	0.779	4.162	11.272	30.084	47.812	54.39	46.782	31.957	21.334	12.487	8.373	4.44	1.751
25-30	0	0	0	0	0.162	0.405	0.877	2.53	8.142	19.239	33.607	43.847	43.632	36.753	25.682	18.498	12.602
30-35	0	0	0	0	0	0.01	0.079	0.331	0.618	2.297	7.301	15.62	23.377	30.604	36.601	31.924	23.975
35-40	0	0	0	0	0	0	0.009	0.074	0.228	0.374	0.963	2.791	7.708	13.535	17.218	24.217	24.986
40-45	0	0	0	0	0	0	0	0.008	0	0.025	0.045	0.203	0.765	3.935	7.178	11.62	17.657
45-50	0	0	0	0	0	0	0	0	0	0.008	0.062	0.087	0.073	0.53	2.703	4.44	9.37
50-55	0	0	0	0	0	0	0	0	0	0	0	0.068	0.084	0.071	0.801	2.333	5.254
55-60	0	0	0	0	0	0	0	0	0	0.008	0	0.039	0.136	0.13	0.341	0.978	2.383
60+	0	0	0	0	0	0	0	0	0	0	0.071	0.116	0.105	0.13	0.223	0.617	1.336
Boys - Southern Africa
Weight Bands	Age (years)
	0.25	0.75	1	2	3	4	5	6	7	8	9	10	11	12	13	14	15
00-03	1.242	0.043	0	0	0	0	0	0	0	0	0	0	0	0	0	0	0
03-06	42.105	11.845	2.106	0.181	0.012	0.006	0	0	0	0	0	0	0	0	0	0	0
06-10	53.992	78.326	53.772	14.422	2.309	0.584	0.175	0.062	0	0	0	0	0	0	0	0	0
10-14	2.661	9.785	42.116	70.094	48.571	21.528	8.571	2.913	1.308	0.426	0.223	0.197	0.179	0.093	0.152	0.028	0.047
14-20	0	0	1.997	15.05	48.282	73.45	75.549	59.561	36.045	17.077	7.547	3.699	1.848	1.142	0.664	0.483	0.29
20-25	0	0	0.008	0.253	0.667	4.081	14.715	34.255	52.456	56.678	45.67	28.028	16.749	9.668	5.169	3.01	1.738
25-30	0	0	0	0	0.159	0.297	0.765	2.697	9.058	22.513	37.079	46.245	42.905	32.197	19.981	12.738	7.24
30-35	0	0	0	0	0	0.055	0.149	0.303	0.7	2.751	7.77	17.24	28.178	35.333	35.204	26.547	18.785
35-40	0	0	0	0	0	0	0.077	0.19	0.221	0.344	1.201	3.405	7.358	14.635	22.082	24.572	21.83
40-45	0	0	0	0	0	0	0	0.021	0.088	0.087	0.229	0.769	1.775	4.556	9.617	16.425	19.482
45-50	0	0	0	0	0	0	0	0	0.077	0.062	0.062	0.176	0.566	1.327	4.461	8.768	14.676
50-55	0	0	0	0	0	0	0	0	0.046	0.041	0.078	0.075	0.218	0.562	1.506	4.529	8.915
55-60	0	0	0	0	0	0	0	0	0	0.015	0.057	0.053	0.062	0.238	0.582	1.685	4.227
60+	0	0	0	0	0	0	0	0	0	0.005	0.083	0.112	0.162	0.249	0.582	1.215	2.771

## Sheet: 4-By regions, girls
Weight-for-age distributions among children with HIV on antiretroviral therapy in the International Epidemiology to evaluate AIDS (IeDEA) multiregional consortium
Girls - Asia-Pacific
Weight Bands	Age (years)
	0.25	0.75	1	2	3	4	5	6	7	8	9	10	11	12	13	14	15
00-03	0	0	0	0	0	0	0	0	0	0	0	0	0	0	0	0	0
03-06	48.925	12.5	1.704	0.398	0.543	0.071	0	0	0	0	0	0	0	0	0	0	0
06-10	50.538	82.5	60.49	20.159	7.877	1.856	0.546	0.247	0.026	0.025	0	0	0	0	0	0	0
10-14	0.538	5	37.061	69.828	59.077	36.795	17.39	8.162	3.805	1.22	0.391	0.323	0.058	0.065	0	0	0
14-20	0	0	0.745	9.284	31.779	59.279	75.66	71.46	55.18	36.324	19.384	7.608	2.589	0.751	0.803	0.386	0.556
20-25	0	0	0	0.265	0.543	1.713	5.827	18.132	35.307	48.17	48.552	36.962	20.829	10.189	2.775	1.757	0.723
25-30	0	0	0	0.066	0.181	0.178	0.455	1.534	4.387	11.668	23.532	34.731	34.925	22.698	14.275	5.184	1.501
30-35	0	0	0	0	0	0.071	0	0.301	1.057	1.983	6.131	13.011	23.303	26.943	20.737	15.124	7.893
35-40	0	0	0	0	0	0.036	0.061	0.027	0.159	0.508	1.409	5.323	10.702	21.424	25.447	25.021	21.512
40-45	0	0	0	0	0	0	0.061	0.082	0.053	0.051	0.391	1.398	5.236	10.973	20.299	26.607	28.293
45-50	0	0	0	0	0	0	0	0.055	0.026	0.051	0.157	0.484	1.697	4.18	9.383	16.667	23.235
50-55	0	0	0	0	0	0	0	0	0	0	0.052	0.054	0.316	1.633	3.614	5.656	10.006
55-60	0	0	0	0	0	0	0	0	0	0	0	0.081	0.173	0.555	1.351	2.528	4.169
60+	0	0	0	0	0	0	0	0	0	0	0	0.027	0.173	0.588	1.314	1.071	2.112
Girls - CCASANet
Weight Bands	Age (years)
	0.25	0.75	1	2	3	4	5	6	7	8	9	10	11	12	13	14	15
00-03	3.714	0	0	0	0	0	0	0	0	0	0	0	0	0	0	0	0
03-06	54.857	24.806	4.578	0.22	0	0	0	0	0	0	0	0	0	0	0	0	0
06-10	39.429	71.705	62.273	16.875	2.453	0.42	0.146	0.044	0.043	0	0	0	0	0	0	0	0
10-14	2	3.488	32.597	72.34	48.742	19.045	7.355	2.034	0.385	0.211	0.043	0.443	0.212	0.639	0.05	0	0
14-20	0	0	0.552	10.418	46.855	75.498	76.376	59.814	35.485	14.737	5.601	2.938	1.989	1.05	0.9	0.323	0.591
20-25	0	0	0	0.147	1.321	4.565	14.515	33.112	53.313	57.558	43.224	20.282	9.437	4.521	1.65	0.808	0
25-30	0	0	0	0	0.566	0.42	1.218	3.979	8.38	20.884	35.186	41.891	27.169	14.521	7.75	6.25	3.367
30-35	0	0	0	0	0.063	0.052	0.39	0.752	1.368	4.589	10.731	21.61	30.258	25.753	17.75	10.722	9.096
35-40	0	0	0	0	0	0	0	0.265	0.641	0.926	2.907	7.807	19.001	23.881	22.35	19.343	12.227
40-45	0	0	0	0	0	0	0	0	0.299	0.674	0.77	2.535	6.771	15.982	20.1	20.313	23.804
45-50	0	0	0	0	0	0	0	0	0.086	0.211	0.941	1.207	3.089	6.758	15.05	20.905	21.205
50-55	0	0	0	0	0	0	0	0	0	0.168	0.385	0.604	0.762	3.196	7.65	11.584	13.822
55-60	0	0	0	0	0	0	0	0	0	0.042	0.214	0.644	0.677	2.055	3.5	4.58	8.21
60+	0	0	0	0	0	0	0	0	0	0	0	0.04	0.635	1.644	3.25	5.172	7.679
Girls - West Africa
Weight Bands	Age (years)
	0.25	0.75	1	2	3	4	5	6	7	8	9	10	11	12	13	14	15
00-03	4.762	0	0	0	0	0	0	0	0	0	0	0	0	0	0	0	0
03-06	61.905	29.078	6.745	0.571	0.055	0.047	0	0	0	0	0	0	0	0	0	0	0
06-10	33.333	65.957	66.862	23.175	2.643	0.565	0.411	0.259	0.034	0	0	0	0	0	0	0	0
10-14	0	4.965	24.927	69.651	60.242	29.143	10.554	5	2.517	1.532	0.613	0.405	0.152	0.128	0	0	0
14-20	0	0	1.466	6.349	36.564	68.032	80.534	67.926	46.069	27.239	14.811	6.446	2.858	1.713	0.454	0.508	0.079
20-25	0	0	0	0.254	0.496	1.977	7.967	25.333	44.276	51.549	44.025	32.081	18.979	9.165	4.183	2.538	1.427
25-30	0	0	0	0	0	0.141	0.411	1.185	6.069	16.241	30.984	36.354	32.889	22.227	11.341	7.487	5.234
30-35	0	0	0	0	0	0.094	0.041	0.296	0.69	2.281	7.661	17.164	24.581	27.323	23.992	11.865	9.516
35-40	0	0	0	0	0	0	0.082	0	0.241	1.021	1.328	5.12	12.424	19.058	23.034	21.383	13.085
40-45	0	0	0	0	0	0	0	0	0.069	0.034	0.443	1.768	6.021	12.42	17.893	23.668	24.98
45-50	0	0	0	0	0	0	0	0	0	0.034	0	0.405	1.639	5.696	10.736	16.561	17.843
50-55	0	0	0	0	0	0	0	0	0.034	0.068	0.034	0.074	0.191	1.542	6.25	8.566	17.209
55-60	0	0	0	0	0	0	0	0	0	0	0.068	0.037	0.038	0.557	1.512	4.505	5.075
60+	0	0	0	0	0	0	0	0	0	0	0.034	0.147	0.229	0.171	0.605	2.919	5.551
Girls - Central Africa
Weight Bands	Age (years)
	0.25	0.75	1	2	3	4	5	6	7	8	9	10	11	12	13	14	15
00-03	0	0	0	0	0	0	0	0	0	0	0	0	0	0	0	0	0
03-06	0	0	0	0	0	0	0	0	0	0	0	0	0	0	0	0	0
06-10	0	0	0	0	0	0	0	0	0	0	0	0	0	0	0	0	0
10-14	0	0	100	87.966	57.817	26.4	16.117	5.335	2.39	0.91	0.157	0.092	0.047	0.557	0	0	0
14-20	0	0	0	0	12.034	42.096	69.046	70.173	61.979	41.185	20.637	8.768	3.741	0.753	0.743	0.397	0
20-25	0	0	0	0	0	0.087	4.431	12.977	29.583	44.871	53.566	41.127	24.896	14.588	6.085	2.383	0.83
25-30	0	0	0	0	0	0	0.123	0.733	2.716	10.458	19.626	34.447	40.462	32.612	20.901	11.321	5.254
30-35	0	0	0	0	0	0	0	0	0.291	0.747	4.35	11.848	20.924	26.635	25.871	19.265	13.33
35-40	0	0	0	0	0	0	0	0	0.048	0.05	0.354	2.923	7.344	14.871	23.363	23.039	18.252
40-45	0	0	0	0	0	0	0	0	0	0.1	0.101	0.313	1.617	6.824	11.937	20.755	22.788
45-50	0	0	0	0	0	0	0	0	0.048	0.199	0.152	0.157	0.508	2.776	6.177	12.413	20.354
50-55	0	0	0	0	0	0	0	0	0	0	0.253	0.261	0.277	0.565	3.437	6.852	9.845
55-60	0	0	0	0	0	0	0	0	0	0	0.051	0	0.092	0.141	0.372	2.979	6.361
60+	0	0	0	0	0	0	0	0	0	0	0	0	0.046	0.188	0.557	0.596	2.987
Girls - East Africa
Weight Bands	Age (years)
	0.25	0.75	1	2	3	4	5	6	7	8	9	10	11	12	13	14	15
00-03	0	0	0	0	0	0	0	0	0	0	0	0	0	0	0	0	0
03-06	34.051	15.949	4.725	0.566	0.034	0.06	0	0	0	0	0	0	0	0	0	0	0
06-10	63.526	77.352	61.276	21.606	4.638	1.035	0.341	0.12	0.084	0.017	0	0	0	0	0	0	0
10-14	2.423	6.699	32.259	68.17	56.1	29.657	12.991	5.261	2.235	1.15	0.388	0.216	0.115	0.09	0.063	0.128	0.017
14-20	0	0	1.74	9.545	38.574	65.759	75.824	66.441	44.325	24.96	12.469	5.009	1.92	1.338	0.702	0.257	0.248
20-25	0	0	0	0.113	0.576	3.207	10.224	25.912	46.451	55.798	49.338	34.575	19.606	9.873	4.614	2.426	1.24
25-30	0	0	0	0	0.056	0.201	0.566	2.051	6.219	16.065	31.857	42.36	41.141	32.081	20.148	10.719	5.802
30-35	0	0	0	0	0.023	0.06	0.036	0.146	0.578	1.567	4.845	13.892	25.417	29.461	28.799	22.909	14.463
35-40	0	0	0	0	0	0.02	0.009	0.017	0.075	0.342	0.856	2.898	8.308	16.44	21.765	24.051	19.636
40-45	0	0	0	0	0	0	0.009	0.051	0	0.025	0.212	0.61	2.129	6.477	13.164	18.741	21.554
45-50	0	0	0	0	0	0	0	0	0	0.008	0.026	0.234	0.818	2.496	5.905	10.933	16.198
50-55	0	0	0	0	0	0	0	0	0.017	0.058	0.009	0.056	0.178	0.888	2.771	5.652	10.661
55-60	0	0	0	0	0	0	0	0	0.017	0.008	0	0.028	0.147	0.371	1.066	2.341	5.587
60+	0	0	0	0	0	0	0	0	0	0	0	0.122	0.22	0.484	1.003	1.841	4.595
Girls - Southern Africa
Weight Bands	Age (years)
	0.25	0.75	1	2	3	4	5	6	7	8	9	10	11	12	13	14	15
00-03	1.43	0	0.017	0	0	0	0	0	0	0	0	0	0	0	0	0	0
03-06	48.337	17.038	3.5	0.195	0.081	0.017	0	0	0	0	0	0	0	0	0	0	0
06-10	49.271	76.204	62.568	19.89	3.519	0.806	0.296	0.103	0.037	0	0	0	0	0	0	0	0
10-14	0.962	6.758	32.519	69.806	57.197	27.402	10.463	4.611	1.891	0.708	0.29	0.152	0.147	0.143	0.081	0.111	0.051
14-20	0	0	1.397	9.868	38.181	68.626	77.154	63.591	40.499	21.801	9.827	3.89	1.921	0.761	0.57	0.439	0.197
20-25	0	0	0	0.242	0.886	2.841	10.99	28.71	47.825	52.617	44.944	30.174	16.207	7.61	4.157	1.724	1.021
25-30	0	0	0	0	0.124	0.261	0.861	2.518	8.287	20.629	33.369	39.238	34.045	23.685	13.457	7.008	3.484
30-35	0	0	0	0	0.012	0.041	0.115	0.277	1.02	3.211	8.459	18.422	27.642	28.904	22.416	15.203	9.469
35-40	0	0	0	0	0	0.006	0.104	0.13	0.26	0.618	2.065	5.316	12.064	19.88	22.15	19.765	15.206
40-45	0	0	0	0	0	0	0.016	0.033	0.096	0.186	0.569	1.899	5.077	11.123	18.922	22.663	21.731
45-50	0	0	0	0	0	0	0	0.027	0.027	0.096	0.139	0.435	1.791	4.619	10.186	16.697	20.885
50-55	0	0	0	0	0	0	0	0	0.042	0.064	0.129	0.103	0.595	2.134	4.616	9.112	15.002
55-60	0	0	0	0	0	0	0	0	0.016	0.032	0.107	0.12	0.198	0.624	2.026	4.189	7.027
60+	0	0	0	0	0	0	0	0	0	0.037	0.102	0.25	0.312	0.517	1.419	3.088	5.927

## Sheet: 5-By ART duration and sex
Weight-for-age distributions among children with HIV on antiretroviral therapy in the International Epidemiology to evaluate AIDS (IeDEA) multiregional consortium
ART duration < 12 months, overall
Weight Bands	Age (years)
	0.25	0.75	1	2	3	4	5	6	7	8	9	10	11	12	13	14	15
00-03	1.249	0.014	0.006	0	0	0	0	0	0	0	0	0	0	0	0	0	0
03-06	43.97	15.39	3.919	0.444	0.066	0.042	0	0	0	0	0	0	0	0	0	0	0
06-10	52.856	76.852	61.997	21.753	5.371	1.481	0.693	0.198	0.044	0.008	0	0	0	0	0	0	0
10-14	1.925	7.744	32.732	68.331	57.862	32.725	16.49	7.665	3.656	1.45	0.52	0.438	0.289	0.285	0.298	0.191	0.019
14-20	0	0	1.339	9.304	36.084	62.865	73.21	66.992	50.102	31.19	16.586	8.07	4.265	2.496	1.253	0.94	0.531
20-25	0	0	0.006	0.166	0.54	2.573	8.796	23.022	40.168	50.78	49.856	37.731	25.102	14.117	8.876	4.79	2.711
25-30	0	0	0	0.003	0.066	0.277	0.686	1.768	5.369	14.423	26.856	37.039	39.443	34.155	23.901	16.576	9.668
30-35	0	0	0	0	0.011	0.038	0.072	0.206	0.388	1.628	4.738	12.834	21.217	27.75	29.17	24.825	19.412
35-40	0	0	0	0	0	0	0.05	0.083	0.112	0.301	0.948	2.763	6.661	13.528	18.057	19.621	18.967
40-45	0	0	0	0	0	0	0.004	0.051	0.052	0.097	0.293	0.737	1.761	4.348	9.61	15.389	17.223
45-50	0	0	0	0	0	0	0	0.016	0.06	0.03	0.056	0.159	0.691	1.827	4.847	8.671	12.853
50-55	0	0	0	0	0	0	0	0	0.04	0.038	0.056	0.06	0.329	0.799	1.856	4.798	9.156
55-60	0	0	0	0	0	0	0	0	0.008	0.038	0.042	0.035	0.074	0.409	1.004	1.873	4.995
60+	0	0	0	0	0	0	0	0	0	0.017	0.051	0.134	0.17	0.285	1.129	2.327	4.464
ART duration ≥ 12 months, overall
Weight Bands	Age (years)
	0.25	0.75	1	2	3	4	5	6	7	8	9	10	11	12	13	14	15
00-03	0	0	0	0	0	0	0	0	0	0	0	0	0	0	0	0	0
03-06	0	0	0.826	0.105	0.047	0.013	0	0	0	0	0	0	0	0	0	0	0
06-10	0	0	40.856	10.91	1.788	0.406	0.083	0.041	0.015	0.002	0	0	0	0	0	0	0
10-14	0	0	55.098	72.006	49.105	21.123	7.407	2.775	1.008	0.486	0.196	0.146	0.083	0.103	0.046	0.059	0.035
14-20	0	0	3.22	16.689	48.034	74.125	78.03	61.613	37.341	18.465	8.124	3.284	1.308	0.694	0.453	0.334	0.26
20-25	0	0	0	0.289	0.848	3.998	13.452	32.147	51.109	55.673	45.119	28.543	15.729	7.93	3.767	1.926	1.003
25-30	0	0	0	0	0.173	0.287	0.839	2.893	9.073	21.347	35.68	43.38	38.685	27.507	16.191	8.762	4.862
30-35	0	0	0	0	0.005	0.04	0.129	0.389	1.046	3.079	8.4	17.96	27.991	31.698	28.86	20.413	13.229
35-40	0	0	0	0	0	0.008	0.05	0.124	0.298	0.631	1.688	4.557	10.559	18.078	22.679	23.718	18.979
40-45	0	0	0	0	0	0	0.009	0.012	0.067	0.174	0.426	1.29	3.543	8.53	14.781	20.143	21.858
45-50	0	0	0	0	0	0	0	0.007	0.022	0.072	0.167	0.429	1.3	3.159	7.44	13.055	18.579
50-55	0	0	0	0	0	0	0	0	0.017	0.052	0.091	0.163	0.379	1.363	3.388	6.592	11.723
55-60	0	0	0	0	0	0	0	0	0.005	0.015	0.054	0.11	0.194	0.482	1.424	2.971	5.433
60+	0	0	0	0	0	0	0	0	0	0.007	0.056	0.136	0.23	0.456	0.971	2.027	4.039
ART duration < 12 months, boys
Weight Bands	Age (years)
	0.25	0.75	1	2	3	4	5	6	7	8	9	10	11	12	13	14	15
00-03	1.029	0.028	0	0	0	0	0	0	0	0	0	0	0	0	0	0	0
03-06	40.403	13.02	3.239	0.433	0.014	0.015	0	0	0	0	0	0	0	0	0	0	0
06-10	55.844	77.778	58.132	18.834	4.459	1.304	0.583	0.133	0	0	0	0	0	0	0	0	0
10-14	2.724	9.174	36.923	69.262	54.216	30.088	14.659	6.071	3.016	1.139	0.428	0.601	0.345	0.297	0.502	0.276	0.022
14-20	0	0	1.693	11.311	40.847	65.37	73.727	66.052	49.454	28.592	15.307	8.348	4.37	2.767	1.21	1.156	0.76
20-25	0	0	0.012	0.16	0.408	2.848	10.119	25.299	41.457	52.637	50.723	35.891	27.054	15.516	10.091	6.469	3.865
25-30	0	0	0	0	0.056	0.352	0.808	2.078	5.458	15.655	27.981	39.562	41.569	38.169	27.265	21.459	13.203
30-35	0	0	0	0	0	0.022	0.075	0.227	0.332	1.459	4.602	13.181	19.945	27.347	33.86	29.705	26.884
35-40	0	0	0	0	0	0	0.03	0.109	0.121	0.319	0.732	1.929	5.216	11.314	16.598	20.424	21.868
40-45	0	0	0	0	0	0	0	0.031	0.04	0.078	0.095	0.353	1	3.207	5.975	11.299	15.027
45-50	0	0	0	0	0	0	0	0	0.081	0.035	0.038	0.073	0.214	0.763	2.641	4.347	8.426
50-55	0	0	0	0	0	0	0	0	0.04	0.043	0.067	0.031	0.167	0.336	0.915	2.605	5.212
55-60	0	0	0	0	0	0	0	0	0	0.043	0	0.021	0.024	0.142	0.354	1.156	2.302
60+	0	0	0	0	0	0	0	0	0	0	0.029	0.01	0.095	0.142	0.59	1.104	2.432
ART duration < 12 months, girls
Weight Bands	Age (years)
	0.25	0.75	1	2	3	4	5	6	7	8	9	10	11	12	13	14	15
00-03	1.45	0	0.012	0	0	0	0	0	0	0	0	0	0	0	0	0	0
03-06	47.228	17.665	4.6	0.456	0.122	0.069	0	0	0	0	0	0	0	0	0	0	0
06-10	50.127	75.964	65.871	25.04	6.357	1.663	0.807	0.264	0.087	0.017	0	0	0	0	0	0	0
10-14	1.195	6.371	28.533	67.281	61.798	35.42	18.391	9.298	4.283	1.749	0.608	0.287	0.238	0.273	0.117	0.119	0.017
14-20	0	0	0.984	7.042	30.941	60.303	72.673	67.956	50.738	33.697	17.808	7.813	4.169	2.247	1.292	0.755	0.353
20-25	0	0	0	0.173	0.684	2.291	7.422	20.687	38.904	48.988	49.028	39.429	23.331	12.83	7.802	3.348	1.817
25-30	0	0	0	0.006	0.076	0.199	0.559	1.45	5.282	13.234	25.781	34.709	37.514	30.464	20.926	12.383	6.93
30-35	0	0	0	0	0.023	0.054	0.07	0.184	0.444	1.791	4.867	12.514	22.37	28.121	25.023	20.634	13.625
35-40	0	0	0	0	0	0	0.07	0.056	0.103	0.283	1.153	3.533	7.971	15.565	19.348	18.931	16.72
40-45	0	0	0	0	0	0	0.008	0.072	0.063	0.117	0.481	1.092	2.452	5.398	12.825	18.901	18.923
45-50	0	0	0	0	0	0	0	0.032	0.04	0.025	0.073	0.239	1.123	2.806	6.797	12.383	16.283
50-55	0	0	0	0	0	0	0	0	0.04	0.033	0.045	0.086	0.475	1.225	2.688	6.68	12.212
55-60	0	0	0	0	0	0	0	0	0.016	0.033	0.082	0.048	0.119	0.654	1.579	2.489	7.082
60+	0	0	0	0	0	0	0	0	0	0.033	0.073	0.249	0.238	0.416	1.605	3.377	6.039
ART duration ≥ 12 months, boys
Weight Bands	Age (years)
	0.25	0.75	1	2	3	4	5	6	7	8	9	10	11	12	13	14	15
00-03	0	0	0	0	0	0	0	0	0	0	0	0	0	0	0	0	0
03-06	0	0	0.679	0.071	0.025	0.012	0	0	0	0	0	0	0	0	0	0	0
06-10	0	0	35.7	8.854	1.428	0.384	0.093	0.023	0	0	0	0	0	0	0	0	0
10-14	0	0	60.339	70.389	45.174	18.206	6.214	2.422	0.805	0.387	0.166	0.102	0.072	0.059	0.052	0.04	0.035
14-20	0	0	3.281	20.34	52.277	76.464	77.733	59.504	35.071	16.907	7.085	3.053	1.339	0.797	0.486	0.423	0.299
20-25	0	0	0	0.346	0.903	4.583	14.891	34.333	52.745	56.21	45.138	28.77	16.276	9.072	4.844	2.489	1.313
25-30	0	0	0	0	0.194	0.319	0.866	3.1	9.927	22.52	37.001	45.279	42.648	31.866	19.826	11.382	6.777
30-35	0	0	0	0	0	0.032	0.16	0.464	1.025	3.102	8.371	17.404	28.039	34.912	34.831	25.761	17.193
35-40	0	0	0	0	0	0	0.043	0.15	0.34	0.59	1.478	3.721	8.387	15.367	21.952	25.69	21.653
40-45	0	0	0	0	0	0	0	0.003	0.055	0.197	0.422	0.911	1.811	5.141	10.242	17.349	20.315
45-50	0	0	0	0	0	0	0	0	0.019	0.054	0.16	0.355	0.776	1.497	4.462	9.182	15.936
50-55	0	0	0	0	0	0	0	0	0.013	0.019	0.061	0.188	0.325	0.638	1.696	4.484	9.2
55-60	0	0	0	0	0	0	0	0	0	0.013	0.048	0.079	0.164	0.35	0.904	1.728	4.405
60+	0	0	0	0	0	0	0	0	0	0.003	0.07	0.138	0.164	0.302	0.703	1.47	2.874
ART duration ≥ 12 months, girls
Weight Bands	Age (years)
	0.25	0.75	1	2	3	4	5	6	7	8	9	10	11	12	13	14	15
00-03	0	0	0	0	0	0	0	0	0	0	0	0	0	0	0	0	0
03-06	0	0	0.965	0.139	0.07	0.013	0	0	0	0	0	0	0	0	0	0	0
06-10	0	0	45.74	12.92	2.167	0.429	0.073	0.06	0.031	0.003	0	0	0	0	0	0	0
10-14	0	0	50.134	73.588	53.251	24.316	8.686	3.149	1.223	0.59	0.227	0.192	0.095	0.148	0.04	0.078	0.035
14-20	0	0	3.162	13.12	43.559	71.564	78.349	63.848	39.745	20.103	9.207	3.521	1.277	0.592	0.421	0.247	0.222
20-25	0	0	0	0.234	0.791	3.358	11.91	29.829	49.377	55.108	45.098	28.31	15.167	6.785	2.704	1.378	0.701
25-30	0	0	0	0	0.151	0.252	0.81	2.674	8.169	20.113	34.304	41.436	34.616	23.136	12.601	6.212	2.997
30-35	0	0	0	0	0.011	0.049	0.095	0.308	1.069	3.054	8.43	18.53	27.941	28.476	22.963	15.21	9.367
35-40	0	0	0	0	0	0.018	0.057	0.096	0.253	0.674	1.907	5.414	12.788	20.796	23.396	21.8	16.374
40-45	0	0	0	0	0	0	0.019	0.021	0.079	0.15	0.43	1.678	5.321	11.929	19.263	22.861	23.361
45-50	0	0	0	0	0	0	0	0.014	0.024	0.09	0.173	0.505	1.838	4.825	10.382	16.822	21.153
50-55	0	0	0	0	0	0	0	0	0.021	0.087	0.123	0.138	0.435	2.089	5.058	8.643	14.181
55-60	0	0	0	0	0	0	0	0	0.01	0.017	0.06	0.141	0.224	0.614	1.937	4.181	6.434
60+	0	0	0	0	0	0	0	0	0	0.01	0.04	0.135	0.298	0.61	1.235	2.569	5.175

## Sheet: 6-By year of visit and sex
Weight-for-age distributions among children with HIV on antiretroviral therapy in the International Epidemiology to evaluate AIDS (IeDEA) multiregional consortium
Visit<2013, overall
Weight Bands	Age (years)
	0.25	0.75	1	2	3	4	5	6	7	8	9	10	11	12	13	14	15
00-03	1.32	0	0.006	0	0	0	0	0	0	0	0	0	0	0	0	0	0
03-06	45.025	16.397	3.554	0.325	0.058	0.028	0	0	0	0	0	0	0	0	0	0	0
06-10	51.957	76.286	58.322	17.875	3.432	0.904	0.329	0.084	0.024	0.005	0	0	0	0	0	0	0
10-14	1.699	7.317	36.465	69.353	53.089	25.738	10.785	4.616	1.958	0.805	0.299	0.238	0.135	0.155	0.073	0.06	0.034
14-20	0	0	1.648	12.231	42.628	69.73	76.53	64.143	42.538	23.495	11.133	4.892	2.148	1.286	0.728	0.486	0.325
20-25	0	0	0.006	0.213	0.691	3.317	11.506	28.31	46.764	53.847	47.297	32.006	19.24	10.395	5.63	2.958	1.726
25-30	0	0	0	0.002	0.096	0.247	0.717	2.426	7.609	18.592	32.344	41.79	39.464	30.027	19.13	11.956	6.896
30-35	0	0	0	0	0.005	0.032	0.083	0.295	0.766	2.505	6.855	15.674	25.34	30.139	29.344	22.535	15.949
35-40	0	0	0	0	0	0.005	0.047	0.109	0.234	0.482	1.37	3.671	8.969	16.197	20.957	22.676	19.993
40-45	0	0	0	0	0	0	0.003	0.009	0.057	0.147	0.365	1.029	2.826	7.06	12.83	18.439	20.299
45-50	0	0	0	0	0	0	0	0.008	0.028	0.063	0.14	0.364	1.146	2.624	6.159	11.215	16.355
50-55	0	0	0	0	0	0	0	0	0.02	0.031	0.076	0.13	0.363	1.166	2.758	5.338	10.051
55-60	0	0	0	0	0	0	0	0	0.003	0.02	0.058	0.09	0.161	0.504	1.309	2.427	4.746
60+	0	0	0	0	0	0	0	0	0	0.008	0.064	0.116	0.208	0.446	1.083	1.91	3.626
Visit≥2013, overall
Weight Bands	Age (years)
	0.25	0.75	1	2	3	4	5	6	7	8	9	10	11	12	13	14	15
00-03	0.664	0.123	0	0	0	0	0	0	0	0	0	0	0	0	0	0	0
03-06	35.261	7.512	1.945	0.183	0.038	0	0	0	0	0	0	0	0	0	0	0	0
06-10	60.284	81.281	56.856	13.873	2.503	0.298	0.106	0.104	0.02	0	0	0	0	0	0	0	0
10-14	3.791	11.084	39.275	72.841	51.037	23.261	8.809	2.978	1.213	0.599	0.23	0.173	0.123	0.122	0.163	0.14	0.027
14-20	0	0	1.924	12.867	45.237	71.685	76.188	60.045	36.296	17.506	8.119	3.437	1.643	0.696	0.432	0.425	0.303
20-25	0	0	0	0.235	0.869	4.234	13.542	33.192	51.642	55.719	43.767	27.873	14.729	6.94	3.402	1.758	0.725
25-30	0	0	0	0	0.296	0.443	1.059	3	9.232	21.921	36.229	41.794	37.404	26.74	15.37	7.587	4.079
30-35	0	0	0	0	0.019	0.073	0.213	0.469	1.142	3.188	9.065	19.241	28.986	32.297	28.059	19.145	12.042
35-40	0	0	0	0	0	0.007	0.059	0.12	0.273	0.712	1.838	5.226	11.29	18.962	23.087	23.131	17.214
40-45	0	0	0	0	0	0	0.024	0.076	0.081	0.169	0.464	1.465	3.852	8.747	15.289	20.404	21.915
45-50	0	0	0	0	0	0	0	0.016	0.051	0.052	0.131	0.355	1.184	3.383	8.331	13.806	19.167
50-55	0	0	0	0	0	0	0	0	0.035	0.098	0.099	0.155	0.377	1.388	3.647	7.852	13.157
55-60	0	0	0	0	0	0	0	0	0.015	0.023	0.032	0.093	0.177	0.376	1.374	3.317	6.373
60+	0	0	0	0	0	0	0	0	0	0.014	0.027	0.187	0.236	0.348	0.846	2.437	4.999
Visit<2013, boys
Weight Bands	Age (years)
	0.25	0.75	1	2	3	4	5	6	7	8	9	10	11	12	13	14	15
00-03	1.155	0	0	0	0	0	0	0	0	0	0	0	0	0	0	0	0
03-06	41.41	13.688	2.898	0.313	0.017	0.016	0	0	0	0	0	0	0	0	0	0	0
06-10	55.197	77.617	54.505	15.33	2.862	0.815	0.289	0.063	0	0	0	0	0	0	0	0	0
10-14	2.238	8.696	40.619	69.317	49.362	23.042	9.341	3.852	1.525	0.645	0.254	0.265	0.155	0.119	0.126	0.037	0.026
14-20	0	0	1.967	14.8	46.965	72.15	76.818	62.577	40.828	21.363	9.951	4.696	2.189	1.475	0.707	0.54	0.31
20-25	0	0	0.012	0.241	0.682	3.705	12.692	30.316	48.267	54.918	47.821	31.721	20.4	11.595	6.847	3.864	2.307
25-30	0	0	0	0	0.112	0.26	0.739	2.695	8.313	19.868	33.374	43.84	42.684	34.138	22.303	15.38	9.475
30-35	0	0	0	0	0	0.013	0.085	0.349	0.714	2.464	6.802	15.346	24.88	32.251	34.96	27.227	20.599
35-40	0	0	0	0	0	0	0.036	0.135	0.245	0.472	1.206	2.917	7.043	13.783	19.686	23.899	22.311
40-45	0	0	0	0	0	0	0	0.012	0.048	0.164	0.306	0.71	1.555	4.397	8.897	15.358	18.356
45-50	0	0	0	0	0	0	0	0	0.039	0.056	0.122	0.254	0.593	1.133	3.784	7.636	13.192
50-55	0	0	0	0	0	0	0	0	0.021	0.025	0.049	0.111	0.242	0.503	1.236	3.564	7.607
55-60	0	0	0	0	0	0	0	0	0	0.022	0.043	0.049	0.113	0.342	0.711	1.311	3.445
60+	0	0	0	0	0	0	0	0	0	0.003	0.072	0.091	0.147	0.264	0.744	1.183	2.372
Visit<2013, girls
Weight Bands	Age (years)
	0.25	0.75	1	2	3	4	5	6	7	8	9	10	11	12	13	14	15
00-03	1.47	0	0.011	0	0	0	0	0	0	0	0	0	0	0	0	0	0
03-06	48.321	18.985	4.206	0.338	0.102	0.042	0	0	0	0	0	0	0	0	0	0	0
06-10	49.002	75.015	62.114	20.589	4.047	1	0.371	0.107	0.05	0.01	0	0	0	0	0	0	0
10-14	1.207	6	32.337	69.392	57.102	28.657	12.333	5.414	2.403	0.967	0.344	0.211	0.115	0.19	0.023	0.083	0.042
14-20	0	0	1.331	9.492	37.958	67.109	76.221	65.779	44.29	25.675	12.32	5.086	2.108	1.102	0.748	0.433	0.338
20-25	0	0	0	0.184	0.701	2.897	10.234	26.213	45.223	52.751	46.771	32.289	18.098	9.22	4.45	2.085	1.183
25-30	0	0	0	0.004	0.079	0.233	0.694	2.145	6.887	17.289	31.309	39.754	36.293	26.002	16.054	8.654	4.489
30-35	0	0	0	0	0.011	0.052	0.081	0.239	0.819	2.547	6.908	15.999	25.793	28.072	23.898	18.009	11.609
35-40	0	0	0	0	0	0.01	0.059	0.082	0.223	0.492	1.535	4.419	10.865	18.561	22.189	21.497	17.829
40-45	0	0	0	0	0	0	0.007	0.006	0.065	0.13	0.423	1.345	4.078	9.668	16.644	21.41	22.113
45-50	0	0	0	0	0	0	0	0.016	0.016	0.07	0.159	0.474	1.691	4.083	8.462	14.665	19.307
50-55	0	0	0	0	0	0	0	0	0.019	0.038	0.103	0.149	0.483	1.816	4.233	7.049	12.333
55-60	0	0	0	0	0	0	0	0	0.006	0.019	0.073	0.131	0.208	0.662	1.889	3.504	5.961
60+	0	0	0	0	0	0	0	0	0	0.013	0.056	0.142	0.268	0.625	1.411	2.611	4.797
Visit≥2013, boys
Weight Bands	Age (years)
	0.25	0.75	1	2	3	4	5	6	7	8	9	10	11	12	13	14	15
00-03	0	0.247	0	0	0	0	0	0	0	0	0	0	0	0	0	0	0
03-06	32.15	7.901	1.965	0.153	0.038	0	0	0	0	0	0	0	0	0	0	0	0
06-10	61.144	79.012	51.494	12.356	1.83	0.217	0.105	0.032	0	0	0	0	0	0	0	0	0
10-14	6.706	12.84	44.494	72.167	46.865	19.332	7.394	2.326	1.153	0.422	0.175	0.115	0.081	0.095	0.197	0.188	0.045
14-20	0	0	2.047	15.145	50.238	74.504	74.982	57.554	33.854	16.151	7.038	3.394	1.602	0.68	0.503	0.638	0.519
20-25	0	0	0	0.179	0.762	5.195	15.889	36.241	53.571	56.23	43.15	27.347	14.598	7.995	4.102	2.216	0.903
25-30	0	0	0	0	0.267	0.651	1.266	3.14	9.741	23.065	38.335	44.06	41.752	31.261	19.542	9.68	5.405
30-35	0	0	0	0	0	0.101	0.316	0.55	1.192	3.241	9.069	19.03	29.446	35.485	33.908	25.287	16.283
35-40	0	0	0	0	0	0	0.047	0.148	0.381	0.652	1.514	4.234	9.192	16.037	23.181	25.998	20.616
40-45	0	0	0	0	0	0	0	0.011	0.059	0.165	0.429	0.946	1.808	5.434	10.245	17.573	20.988
45-50	0	0	0	0	0	0	0	0	0.029	0.028	0.149	0.371	0.788	1.796	4.683	9.272	16.825
50-55	0	0	0	0	0	0	0	0	0.02	0.028	0.096	0.247	0.403	0.728	2.149	5.143	9.907
55-60	0	0	0	0	0	0	0	0	0	0.018	0.018	0.106	0.179	0.217	0.947	2.195	4.988
60+	0	0	0	0	0	0	0	0	0	0	0.026	0.15	0.152	0.274	0.542	1.808	3.521
Visit≥2013, girls
Weight Bands	Age (years)
	0.25	0.75	1	2	3	4	5	6	7	8	9	10	11	12	13	14	15
00-03	1.277	0	0	0	0	0	0	0	0	0	0	0	0	0	0	0	0
03-06	38.139	7.125	1.925	0.214	0.038	0	0	0	0	0	0	0	0	0	0	0	0
06-10	59.489	83.538	62.109	15.456	3.18	0.379	0.108	0.18	0.042	0	0	0	0	0	0	0	0
10-14	1.095	9.337	34.162	73.545	55.23	27.22	10.252	3.674	1.277	0.783	0.288	0.232	0.166	0.15	0.131	0.096	0.01
14-20	0	0	1.804	10.491	40.211	68.844	77.417	62.7	38.912	18.915	9.265	3.48	1.684	0.712	0.365	0.23	0.104
20-25	0	0	0	0.294	0.977	3.266	11.148	29.941	49.576	55.187	44.421	28.404	14.864	5.894	2.736	1.339	0.561
25-30	0	0	0	0	0.326	0.233	0.848	2.851	8.687	20.73	33.996	39.506	32.931	22.257	11.405	5.672	2.858
30-35	0	0	0	0	0.038	0.044	0.108	0.383	1.088	3.133	9.061	19.454	28.514	29.135	22.5	13.525	8.137
35-40	0	0	0	0	0	0.015	0.072	0.09	0.157	0.774	2.182	6.229	13.447	21.863	22.997	20.507	14.081
40-45	0	0	0	0	0	0	0.048	0.146	0.105	0.172	0.501	1.99	5.955	12.033	20.082	22.994	22.768
45-50	0	0	0	0	0	0	0	0.034	0.073	0.076	0.111	0.339	1.592	4.957	11.798	17.953	21.324
50-55	0	0	0	0	0	0	0	0	0.052	0.172	0.102	0.062	0.35	2.043	5.07	10.33	16.149
55-60	0	0	0	0	0	0	0	0	0.031	0.029	0.046	0.08	0.175	0.534	1.781	4.342	7.648
60+	0	0	0	0	0	0	0	0	0	0.029	0.028	0.223	0.322	0.422	1.134	3.013	6.36

## Sheet: 7- Regions, ART duration, boys
Weight-for-age distributions among children with HIV on antiretroviral therapy in the International Epidemiology to evaluate AIDS (IeDEA) multiregional consortium
ART duration < 12 months, Asia-pacific, boys																			ART duration ≥ 12 months, Asia-pacific, boys
Weight Bands	Age (years)																		Weight Bands	Age (years)
	0.25	0.75	1	2	3	4	5	6	7	8	9	10	11	12	13	14	15			0.25	0.75	1	2	3	4	5	6	7	8	9	10	11	12	13	14	15
00-03	0	0	0	0	0	0	0	0	0	0	0	0	0	0	0	0	0		00-03	0	0	0	0	0	0	0	0	0	0	0	0	0	0	0	0	0
03-06	37.551	5.056	2.515	0.444	0.066	0.042	0	0	0	0	0	0	0	0	0	0	0		03-06	0	0	0	0.135	0	0	0	0	0	0	0	0	0	0	0	0	0
06-10	59.592	84.831	54.611	14.551	4.111	1.276	1.318	0	0	0	0	0	0	0	0	0	0		06-10	0	0	28.384	5.142	0.655	0.246	0	0	0	0	0	0	0	0	0	0	0
10-14	2.857	10.112	42.395	74.316	63.289	38.265	19.27	11.244	6.531	0.642	0.868	1.058	0	0.368	0	0	0		10-14	0	0	68.559	72.124	47.055	22.359	8.425	3.922	1.353	0.239	0.09	0	0	0	0	0	0
14-20	0	0	0.479	11.133	31.931	58.673	71.4	75.025	67.773	49.679	30.382	17.46	3.207	2.206	2.941	0	0		14-20	0	0	3.057	22.463	51.273	71.204	75.066	65.902	46.218	28.61	13.223	5.9	2.043	0.427	0.133	0	0
20-25	0	0	0	0	0.669	1.616	7.201	11.244	21.306	41.335	55.208	49.206	29.446	17.279	13.529	3.937	4		20-25	0	0	0	0.135	0.945	5.553	14.469	23.795	40.621	50	54.003	43.035	26.423	12.413	3.8	1.145	0.202
25-30	0	0	0	0	0	0.17	0.507	1.891	3.426	6.033	10.243	23.81	33.236	38.971	29.412	8.661	4		25-30	0	0	0	0	0.073	0.639	1.851	4.919	8.825	14.409	21.259	33.425	42.331	37.161	23.023	8.845	2.555
30-35	0	0	0	0	0	0	0.304	0.597	0.535	0.77	1.389	6.085	20.117	23.162	27.059	25.197	4		30-35	0	0	0	0	0	0	0.189	1.329	2.276	4.684	6.717	10.219	16.008	25.756	29.651	20.291	9.415
35-40	0	0	0	0	0	0	0	0	0.214	0.77	1.563	2.116	8.163	7.353	12.353	30.709	24		35-40	0	0	0	0	0	0	0	0.133	0.707	1.372	2.519	3.528	6.832	11.676	18.78	23.829	18.763
40-45	0	0	0	0	0	0	0	0	0.214	0.642	0	0	2.041	5.515	7.647	18.898	36		40-45	0	0	0	0	0	0	0	0	0	0.626	1.649	2.281	2.981	6.439	11.798	20.604	24.21
45-50	0	0	0	0	0	0	0	0	0	0.128	0.347	0.265	1.166	2.941	2.941	8.661	16		45-50	0	0	0	0	0	0	0	0	0	0.06	0.33	0.821	2.043	2.948	4.684	12.175	22.26
50-55	0	0	0	0	0	0	0	0	0	0	0	0	2.041	0	1.176	1.575	6		50-55	0	0	0	0	0	0	0	0	0	0	0.18	0.608	0.737	1.707	3.668	6.139	9.751
55-60	0	0	0	0	0	0	0	0	0	0	0	0	0.583	1.471	0.588	1.575	2		55-60	0	0	0	0	0	0	0	0	0	0	0.03	0.152	0.368	0.815	2.43	2.237	6.12
60+	0	0	0	0	0	0	0	0	0	0	0	0	0	0.735	2.353	0.787	4		60+	0	0	0	0	0	0	0	0	0	0	0	0.03	0.234	0.659	2.033	4.735	6.725
ART duration < 12 months, CCASANet, boys																			ART duration ≥ 12 months, CCASANet, boys
Weight Bands	Age (years)																		Weight Bands	Age (years)
	0.25	0.75	1	2	3	4	5	6	7	8	9	10	11	12	13	14	15			0.25	0.75	1	2	3	4	5	6	7	8	9	10	11	12	13	14	15
00-03	1.333	0	0	0	0	0	0	0	0	0	0	0	0	0	0	0	0		00-03	0	0	0	0	0	0	0	0	0	0	0	0	0	0	0	0	0
03-06	50.222	15.301	2.751	0.672	0	0	0	0	0	0	0	0	0	0	0	0	0		03-06	0	0	2.235	0	0	0	0	0	0	0	0	0	0	0	0	0	0
06-10	48.444	82.514	55.846	11.429	1.538	1.515	0.229	0.256	0	0	0	0	0	0	0	0	0		06-10	0	0	45.81	5.136	0.446	0.261	0	0	0	0	0	0	0	0	0	0	0
10-14	0	2.186	39.752	74.79	44.176	22.348	9.862	1.023	0.923	0.727	0	0	0	0	0	0	0		10-14	0	0	51.397	73.867	41.472	11.923	3.683	0.389	0	0.113	0.057	0.167	0	0.186	0	0.072	0
14-20	0	0	1.651	13.109	54.286	74.811	72.936	59.335	39.077	21.091	12.595	7.692	4.641	2.4	0.385	1.158	0.649		14-20	0	0	0.559	20.997	57.191	84.073	78.541	50.487	26.208	11.695	3.693	2.117	1.615	0.994	0.26	0.579	0.538
20-25	0	0	0	0	0	1.136	14.22	34.783	51.692	61.091	43.511	36.713	15.19	10.8	16.154	12.355	11.688		20-25	0	0	0	0	0.892	3.742	17.21	43.933	57.005	51.412	36.761	21.114	12.416	7.019	5.917	3.473	2.381
25-30	0	0	0	0	0	0.189	2.752	3.325	6.154	13.455	36.26	34.266	40.084	29.2	28.462	14.286	12.338		25-30	0	0	0	0	0	0	0.567	4.413	14.372	30.508	42.102	41.894	32.906	22.236	13.069	7.308	5.223
30-35	0	0	0	0	0	0	0	1.279	1.538	1.455	6.107	18.182	34.177	24.8	31.154	24.324	22.727		30-35	0	0	0	0	0	0	0	0.454	1.449	3.277	11.648	22.674	34.41	32.609	27.958	16.86	12.212
35-40	0	0	0	0	0	0	0	0	0.615	0	1.527	3.147	5.907	24.4	15.769	19.691	23.377		35-40	0	0	0	0	0	0	0	0.324	0.845	1.638	2.784	6.518	10.746	20.745	23.732	22.865	14.055
40-45	0	0	0	0	0	0	0	0	0	0.364	0	0	0	7.6	4.615	18.147	14.935		40-45	0	0	0	0	0	0	0	0	0.121	1.243	1.591	2.34	3.341	9.006	13.524	22.287	17.588
45-50	0	0	0	0	0	0	0	0	0	1.091	0	0	0	0.8	1.923	5.405	5.844		45-50	0	0	0	0	0	0	0	0	0	0.113	0.966	1.671	2.171	3.043	7.152	13.169	22.12
50-55	0	0	0	0	0	0	0	0	0	0.727	0	0	0	0	0.385	3.089	5.195		50-55	0	0	0	0	0	0	0	0	0	0	0.227	0.613	1.225	1.553	3.251	5.427	13.441
55-60	0	0	0	0	0	0	0	0	0	0	0	0	0	0	1.154	1.544	1.948		55-60	0	0	0	0	0	0	0	0	0	0	0.17	0.39	0.668	1.491	2.276	3.835	5.991
60+	0	0	0	0	0	0	0	0	0	0	0	0	0	0	0	0	1.299		60+	0	0	0	0	0	0	0	0	0	0	0	0.501	0.501	1.118	2.861	4.124	6.452
ART duration < 12 months, West Africa, boys																			ART duration ≥ 12 months, West Africa, boys
Weight Bands	Age (years)																		Weight Bands	Age (years)
	0.25	0.75	1	2	3	4	5	6	7	8	9	10	11	12	13	14	15			0.25	0.75	1	2	3	4	5	6	7	8	9	10	11	12	13	14	15
00-03	0	0	0	0	0	0	0	0	0	0	0	0	0	0	0	0	0		00-03	0	0	0	0	0	0	0	0	0	0	0	0	0	0	0	0	0
03-06	52.941	25.806	6.076	0.331	0	0	0	0	0	0	0	0	0	0	0	0	0		03-06	0	0	0.862	0.135	0.067	0	0	0	0	0	0	0	0	0	0	0	0
06-10	41.176	66.667	61.892	27.213	6.9	1.958	1.256	0.118	0	0	0	0	0	0	0	0	0		06-10	0	0	33.621	9.878	1.134	0.47	0.044	0	0	0	0	0	0	0	0	0	0
10-14	5.882	7.527	30.99	66.501	59.05	30.477	18.593	7.91	3.457	3.724	0.966	1.401	0	0.543	0	5.046	0		10-14	0	0	63.793	70.636	50.634	21.055	5.997	2.54	0.708	0.373	0.301	0.235	0.208	0.098	0.224	0.07	0
14-20	0	0	0.955	5.955	33.824	64.749	72.613	70.012	55.926	31.31	17.552	14.886	7.264	5.435	5.054	1.835	2.817		14-20	0	0	1.724	19.215	47.231	74.451	80.853	63.71	37.286	15.491	6.215	2.156	0.581	0.393	0.73	0.842	0.672
20-25	0	0	0.087	0	0.226	2.203	7.161	20.897	35.926	51.586	51.208	35.727	30.751	25	11.191	9.633	4.93		20-25	0	0	0	0.135	0.734	3.553	11.95	30.927	53.318	61.254	49.04	30.067	16.521	7.957	3.816	1.964	1.595
25-30	0	0	0	0	0	0.612	0.251	0.59	4.198	11.862	26.57	30.298	41.646	28.804	31.408	24.771	15.493		25-30	0	0	0	0	0.2	0.47	0.8	2.419	7.494	19.746	36.083	46.609	43.421	34.578	23.064	12.903	5.877
30-35	0	0	0	0	0	0	0.126	0.236	0.37	0.828	2.738	12.785	12.107	27.717	26.354	29.817	31.69		30-35	0	0	0	0	0	0	0.355	0.323	0.932	2.277	6.516	16.582	28.144	35.265	34.119	26.157	23.846
35-40	0	0	0	0	0	0	0	0.236	0.123	0.69	0.966	3.678	6.78	9.239	15.162	15.596	19.014		35-40	0	0	0	0	0	0	0	0.081	0.224	0.747	1.243	2.822	7.68	14.145	20.932	25.877	17.8
40-45	0	0	0	0	0	0	0	0	0	0	0	0.876	1.211	2.989	9.386	6.881	11.972		40-45	0	0	0	0	0	0	0	0	0	0.075	0.339	0.823	2.034	4.568	9.484	16.41	20.991
45-50	0	0	0	0	0	0	0	0	0	0	0	0.35	0.242	0.272	1.444	4.587	6.338		45-50	0	0	0	0	0	0	0	0	0.037	0	0.188	0.431	0.872	1.817	4.433	8.205	14.022
50-55	0	0	0	0	0	0	0	0	0	0	0	0	0	0	0	1.376	1.408		50-55	0	0	0	0	0	0	0	0	0	0.037	0.038	0.274	0.457	0.982	1.796	4.348	8.984
55-60	0	0	0	0	0	0	0	0	0	0	0	0	0	0	0	0.459	2.113		55-60	0	0	0	0	0	0	0	0	0	0	0	0	0.042	0.098	1.178	2.034	4.198
60+	0	0	0	0	0	0	0	0	0	0	0	0	0	0	0	0	4.225		60+	0	0	0	0	0	0	0	0	0	0	0.038	0	0.042	0.098	0.224	1.192	2.015
ART duration < 12 months, Central Africa, boys																			ART duration ≥ 12 months, Central Africa, boys
Weight Bands	Age (years)																		Weight Bands	Age (years)
	0.25	0.75	1	2	3	4	5	6	7	8	9	10	11	12	13	14	15			0.25	0.75	1	2	3	4	5	6	7	8	9	10	11	12	13	14	15
00-03	0	0	0	0	0	0	0	0	0	0	0	0	0	0	0	0	0		00-03	0	0	0	0	0	0	0	0	0	0	0	0	0	0	0	0	0
03-06	0	0	0	0	0	0	0	0	0	0	0	0	0	0	0	0	0		03-06	0	0	0	0	0	0	0	0	0	0	0	0	0	0	0	0	0
06-10	0	0	0	0	0	0	0	0	0	0	0	0	0	0	0	0	0		06-10	0	0	0	0	0	0	0	0	0	0	0	0	0	0	0	0	0
10-14	0	0	97.674	86.172	57.8	25.678	13.758	6.178	3.244	0.182	0	0	0	0.232	0	0.587	0		10-14	0	0	100	72.683	47.694	16.156	4.957	4.742	0.287	0.403	0.188	0	0	0	0.064	0	0
14-20	0	0	2.326	13.683	42.036	71.93	78.85	56.522	45.229	19.818	12.62	7.424	3.009	4.176	0.777	2.639	0		14-20	0	0	0	27.317	51.406	79.326	77.594	60.391	32.665	14.899	5.905	1.992	0.425	0.448	0.386	0	0.071
20-25	0	0	0	0.146	0.164	2.392	6.982	32.952	45.038	61.091	54.302	33.624	25.463	15.545	9.585	7.331	3.273		20-25	0	0	0	0	0.9	4.518	17.052	32.706	56.232	54.899	39.447	26.976	13.609	6.65	3.604	1.517	2.045
25-30	0	0	0	0	0	0	0.411	4.348	6.107	16.909	30.593	43.45	38.889	41.531	26.684	17.302	15.273		25-30	0	0	0	0	0	0	0.397	2.092	10.1	26.98	45.226	47.616	42.284	27.749	14.028	7.586	4.302
30-35	0	0	0	0	0	0	0	0	0.191	0.727	1.912	15.066	23.148	28.77	34.974	23.46	26.182		30-35	0	0	0	0	0	0	0	0.07	0.645	2.617	8.417	20.278	33.05	40.281	36.229	21.034	11.636
35-40	0	0	0	0	0	0	0	0	0.191	0.364	0.574	0.218	9.491	6.729	22.021	22.874	18.545		35-40	0	0	0	0	0	0	0	0	0	0.201	0.754	2.836	9.113	19.246	27.799	30.345	21.58
40-45	0	0	0	0	0	0	0	0	0	0	0	0.218	0	2.32	4.663	18.475	17.455		40-45	0	0	0	0	0	0	0	0	0.072	0	0.063	0.121	0.851	4.028	11.133	21.586	20.31
45-50	0	0	0	0	0	0	0	0	0	0	0	0	0	0.696	1.295	4.985	6.909		45-50	0	0	0	0	0	0	0	0	0	0	0	0.121	0.668	0.959	4.118	11.31	21.65
50-55	0	0	0	0	0	0	0	0	0	0	0	0	0	0	0	1.173	6.909		50-55	0	0	0	0	0	0	0	0	0	0	0	0.06	0	0.448	1.094	5.172	11.707
55-60	0	0	0	0	0	0	0	0	0	0.909	0	0	0	0	0	0.293	2.182		55-60	0	0	0	0	0	0	0	0	0	0	0	0	0	0.192	1.03	0.897	5.007
60+	0	0	0	0	0	0	0	0	0	0	0	0	0	0	0	0.88	3.273		60+	0	0	0	0	0	0	0	0	0	0	0	0	0	0	0.515	0.552	1.693
ART duration < 12 months, East Africa, boys																			ART duration ≥ 12 months, East Africa, boys
Weight Bands	Age (years)																		Weight Bands	Age (years)
	0.25	0.75	1	2	3	4	5	6	7	8	9	10	11	12	13	14	15			0.25	0.75	1	2	3	4	5	6	7	8	9	10	11	12	13	14	15
00-03	0.468	0	0	0	0	0	0	0	0	0	0	0	0	0	0	0	0		00-03	0	0	0	0	0	0	0	0	0	0	0	0	0	0	0	0	0
03-06	25.741	15.166	4.463	0.85	0.023	0.025	0	0	0	0	0	0	0	0	0	0	0		03-06	0	0	1.764	0.122	0.061	0.047	0	0	0	0	0	0	0	0	0	0	0
06-10	70.671	75.671	58.251	21.772	5.966	1.406	0.681	0.188	0	0	0	0	0	0	0	0	0		06-10	0	0	43.826	11.49	2.499	0.79	0.224	0.025	0	0	0	0	0	0	0	0	0
10-14	3.12	9.163	34.925	65.058	53.648	29.558	13.29	5.371	2.773	1.416	0.284	0.846	0.376	0.416	0.749	0.127	0		10-14	0	0	51.153	68.25	42.298	19.428	7.469	3.058	0.961	0.701	0.236	0.094	0.044	0.079	0.053	0.079	0.046
14-20	0	0	2.361	12.062	39.743	65.63	76.286	66.879	50.356	31.288	15.261	7.508	5.229	2.267	0.799	1.46	1.141		14-20	0	0	3.256	19.651	53.912	74.391	78.587	60.933	37.316	19.085	9.214	4.009	1.655	1.454	0.588	0.651	0.51
20-25	0	0	0	0.257	0.505	2.961	8.641	25.041	40.245	48.945	48.057	36.517	28.631	13.929	11.483	6.54	3.097		20-25	0	0	0	0.487	1.024	4.932	12.839	32.811	51.563	56.72	46.281	30.229	18.52	11.994	7.264	3.788	1.368
25-30	0	0	0	0	0.115	0.419	1.08	2.309	6.307	16.324	29.858	39.161	42.927	42.203	29.805	24.571	16.055		25-30	0	0	0	0	0.205	0.395	0.755	2.65	9.052	20.487	35.08	45.623	43.904	34.893	24.212	16.611	11.619
30-35	0	0	0	0	0	0	0.023	0.141	0.245	1.777	5.656	13.676	17.607	24.803	35.047	32.635	27.547		30-35	0	0	0	0	0	0.016	0.112	0.433	0.803	2.519	7.947	16.357	25.602	32.585	37.155	31.703	22.959
35-40	0	0	0	0	0	0	0	0.047	0.074	0.25	0.821	2.009	4.703	13.373	15.627	20.889	21.271		35-40	0	0	0	0	0	0	0.014	0.089	0.304	0.428	1.018	3.087	8.868	13.59	17.785	25.252	26.044
40-45	0	0	0	0	0	0	0	0.024	0	0	0	0.247	0.489	2.638	4.343	8.381	14.996		40-45	0	0	0	0	0	0	0	0	0	0.036	0.062	0.187	0.871	4.377	8.189	12.626	18.414
45-50	0	0	0	0	0	0	0	0	0	0	0	0.035	0	0.37	0.999	1.587	8.313		45-50	0	0	0	0	0	0	0	0	0	0.012	0.087	0.107	0.102	0.585	3.311	5.326	9.671
50-55	0	0	0	0	0	0	0	0	0	0	0	0	0	0	0.499	1.714	4.482		50-55	0	0	0	0	0	0	0	0	0	0	0	0.094	0.116	0.095	0.908	2.525	5.473
55-60	0	0	0	0	0	0	0	0	0	0	0	0	0	0	0.2	1.143	2.2		55-60	0	0	0	0	0	0	0	0	0	0.012	0	0.053	0.189	0.174	0.392	0.927	2.435
60+	0	0	0	0	0	0	0	0	0	0	0.063	0	0.038	0	0.449	0.952	0.896		60+	0	0	0	0	0	0	0	0	0	0	0.075	0.16	0.131	0.174	0.142	0.513	1.461
ART duration < 12 months, Southern Africa, boys																			ART duration ≥ 12 months, Southern Africa, boys
Weight Bands	Age (years)																		Weight Bands	Age (years)
	0.25	0.75	1	2	3	4	5	6	7	8	9	10	11	12	13	14	15			0.25	0.75	1	2	3	4	5	6	7	8	9	10	11	12	13	14	15
00-03	1.242	0.043	0	0	0	0	0	0	0	0	0	0	0	0	0	0	0		00-03	0	0	0	0	0	0	0	0	0	0	0	0	0	0	0	0	0
03-06	42.105	11.845	2.54	0.279	0.015	0.016	0	0	0	0	0	0	0	0	0	0	0		03-06	0	0	0.264	0.046	0.01	0	0	0	0	0	0	0	0	0	0	0	0
06-10	53.992	78.326	58.631	18.471	3.83	1.27	0.39	0.119	0	0	0	0	0	0	0	0	0		06-10	0	0	33.143	8.819	1.271	0.233	0.069	0.037	0	0	0	0	0	0	0	0	0
10-14	2.661	9.785	37.201	69.766	52.92	29.937	14.765	5.754	2.65	0.813	0.465	0.43	0.44	0.235	0.516	0.031	0.036		10-14	0	0	62.984	70.548	45.605	17.228	5.536	1.688	0.751	0.268	0.13	0.11	0.096	0.046	0.041	0.027	0.05
14-20	0	0	1.617	11.328	42.813	65.082	72.187	64.505	45.868	24.841	13.852	7.53	3.778	2.705	1.168	0.854	0.58		14-20	0	0	3.609	20.201	52.011	77.728	77.197	57.43	31.966	13.901	5.105	2.261	1.233	0.631	0.511	0.375	0.21
20-25	0	0	0.01	0.156	0.379	3.288	11.878	27.324	45.499	55.446	51.759	34.735	26.35	15.663	8.718	5.767	3.772		20-25	0	0	0	0.386	0.864	4.486	16.105	37.242	55.346	57.182	43.312	25.51	13.69	7.707	4.091	2.204	1.178
25-30	0	0	0	0	0.044	0.358	0.64	1.907	5.264	17.026	28.282	41.932	41.738	37.065	25.448	21.239	11.824		25-30	0	0	0	0	0.238	0.266	0.826	3.038	10.633	24.758	40.486	47.864	43.277	30.605	18.321	10.253	5.979
30-35	0	0	0	0	0	0.049	0.078	0.17	0.298	1.503	4.729	13.026	21.02	28.881	34.166	29.539	27.058		30-35	0	0	0	0	0	0.058	0.184	0.36	0.867	3.262	8.948	18.822	30.459	37.443	35.519	25.671	16.509
35-40	0	0	0	0	0	0	0.062	0.17	0.105	0.265	0.54	1.76	4.681	10.395	16.92	19.927	22.488		35-40	0	0	0	0	0	0	0.084	0.198	0.27	0.376	1.456	4.023	8.211	16.022	23.649	25.93	21.649
40-45	0	0	0	0	0	0	0	0.051	0.053	0.053	0.186	0.411	1.367	3.198	6.763	11.413	14.581		40-45	0	0	0	0	0	0	0	0.007	0.102	0.101	0.245	0.903	1.905	5	10.484	17.891	20.83
45-50	0	0	0	0	0	0	0	0	0.175	0	0.037	0.059	0.301	0.87	3.802	5.34	8.741		45-50	0	0	0	0	0	0	0	0	0.036	0.087	0.072	0.22	0.65	1.477	4.661	9.771	16.309
50-55	0	0	0	0	0	0	0	0	0.088	0.053	0.13	0.059	0.162	0.611	1.331	3.265	5.55		50-55	0	0	0	0	0	0	0	0	0.029	0.036	0.058	0.081	0.236	0.546	1.559	4.899	9.841
55-60	0	0	0	0	0	0	0	0	0	0	0	0.039	0	0.165	0.435	1.251	2.394		55-60	0	0	0	0	0	0	0	0	0	0.022	0.079	0.059	0.081	0.262	0.627	1.811	4.731
60+	0	0	0	0	0	0	0	0	0	0	0.019	0.02	0.162	0.212	0.733	1.373	2.974		60+	0	0	0	0	0	0	0	0	0	0.007	0.108	0.147	0.162	0.262	0.536	1.169	2.715

## Sheet: 8-Regions, ART duration, girls
Weight-for-age distributions among children with HIV on antiretroviral therapy in the International Epidemiology to evaluate AIDS (IeDEA) multiregional consortium
ART duration < 12 months, Asia-pacific, girls																			ART duration ≥ 12 months, Asia-pacific, girls
Weight Bands	Age (years)																		Weight Bands	Age (years)
	0.25	0.75	1	2	3	4	5	6	7	8	9	10	11	12	13	14	15			0.25	0.75	1	2	3	4	5	6	7	8	9	10	11	12	13	14	15
00-03	0	0	0	0	0	0	0	0	0	0	0	0	0	0	0	0	0		00-03	0	0	0	0	0	0	0	0	0	0	0	0	0	0	0	0	0
03-06	48.925	12.5	1.931	0.708	1.212	0.191	0	0	0	0	0	0	0	0	0	0	0		03-06	0	0	0.935	0	0	0	0	0	0	0	0	0	0	0	0	0	0
06-10	50.538	82.5	69.931	29.599	13.636	4.302	1.8	0.849	0	0	0	0	0	0	0	0	0		06-10	0	0	28.505	8.03	3.199	0.399	0	0.037	0.034	0.032	0	0	0	0	0	0	0
10-14	0.538	5	27.724	62.028	62.323	46.845	30.5	19.002	8.905	3.012	0.346	0.178	0.254	0	0	0	0		10-14	0	0	68.692	79.848	56.44	30.809	11.678	4.393	2.37	0.741	0.399	0.348	0.032	0.072	0	0	0
14-20	0	0	0.414	7.193	22.727	47.514	65.1	68.684	61.974	53.735	34.429	16.043	7.125	3.413	4.721	1.227	0		14-20	0	0	1.869	11.97	39.13	66.287	80.261	72.425	53.268	31.669	16.713	6.11	2.011	0.469	0.439	0.322	0.58
20-25	0	0	0	0.354	0.101	1.147	2.3	10.085	26.835	34.217	43.772	41.355	30.025	22.867	3.863	13.497	2.632		20-25	0	0	0	0.152	0.902	2.05	7.364	20.93	37.69	51.901	49.401	36.182	19.656	8.848	2.674	0.875	0.638
25-30	0	0	0	0.118	0	0	0.3	0.849	1.805	7.831	17.474	29.234	38.168	30.717	22.318	10.429	3.947		25-30	0	0	0	0	0.328	0.285	0.523	1.772	5.113	12.693	24.608	35.708	34.512	21.849	13.528	4.79	1.393
30-35	0	0	0	0	0	0	0	0.531	0.481	1.205	3.114	9.626	15.776	17.065	12.876	14.724	5.263		30-35	0	0	0	0	0	0.114	0	0.221	1.219	2.191	6.667	13.612	24.262	27.988	21.468	15.154	8.009
35-40	0	0	0	0	0	0	0	0	0	0	0.519	3.387	4.58	11.263	15.88	12.27	19.737		35-40	0	0	0	0	0	0.057	0.087	0.037	0.203	0.644	1.567	5.666	11.482	22.499	26.337	25.979	21.59
40-45	0	0	0	0	0	0	0	0	0	0	0.173	0.178	3.053	5.461	21.459	24.54	19.737		40-45	0	0	0	0	0	0	0.087	0.111	0.068	0.064	0.43	1.614	5.514	11.557	20.192	26.762	28.671
45-50	0	0	0	0	0	0	0	0	0	0	0.173	0	0.254	3.754	8.155	12.27	30.263		45-50	0	0	0	0	0	0	0	0.074	0.034	0.064	0.154	0.57	1.881	4.225	9.497	16.997	22.925
50-55	0	0	0	0	0	0	0	0	0	0	0	0	0.254	1.365	2.146	7.975	10.526		50-55	0	0	0	0	0	0	0	0	0	0	0.061	0.063	0.324	1.661	3.751	5.481	9.983
55-60	0	0	0	0	0	0	0	0	0	0	0	0	0.509	3.413	2.575	0.613	3.947		55-60	0	0	0	0	0	0	0	0	0	0	0	0.095	0.13	0.253	1.237	2.672	4.179
60+	0	0	0	0	0	0	0	0	0	0	0	0	0	0.683	6.009	2.454	3.947		60+	0	0	0	0	0	0	0	0	0	0	0	0.032	0.195	0.578	0.878	0.967	2.031
ART duration < 12 months, CCASANet, girls																			ART duration ≥ 12 months, CCASANet, girls
Weight Bands	Age (years)																		Weight Bands	Age (years)
	0.25	0.75	1	2	3	4	5	6	7	8	9	10	11	12	13	14	15			0.25	0.75	1	2	3	4	5	6	7	8	9	10	11	12	13	14	15
00-03	3.714	0	0	0	0	0	0	0	0	0	0	0	0	0	0	0	0		00-03	0	0	0	0	0	0	0	0	0	0	0	0	0	0	0	0	0
03-06	54.857	24.806	4.334	0.18	0	0	0	0	0	0	0	0	0	0	0	0	0		03-06	0	0	5.296	0.248	0	0	0	0	0	0	0	0	0	0	0	0	0
06-10	39.429	71.705	66.385	18.165	2.806	0.956	0.685	0.217	0	0	0	0	0	0	0	0	0		06-10	0	0	50.156	15.985	2.291	0.217	0	0	0.051	0	0	0	0	0	0	0	0
10-14	2	3.488	28.964	76.978	59.92	23.136	10.731	4.783	1.882	0	0.318	0	0.974	0	0	0	0		10-14	0	0	43.302	69.145	43.63	17.498	6.44	1.332	0.102	0.241	0	0.508	0.097	0.718	0.057	0	0
14-20	0	0	0.317	4.317	36.874	72.658	78.995	70	50.538	22.559	14.013	7.524	3.247	1.674	0	0	0.417		14-20	0	0	1.246	14.622	51.421	76.573	75.666	57.214	32.639	13.619	4.296	2.262	1.8	0.974	1.026	0.382	0.619
20-25	0	0	0	0.36	0.401	3.25	7.306	24.348	43.817	45.455	44.904	39.498	15.26	14.226	6.504	2.113	0		20-25	0	0	0	0	1.742	5.061	16.471	35.35	55.109	59.288	42.963	17.452	8.564	3.332	0.969	0.573	0
25-30	0	0	0	0	0	0	1.826	0.435	3.763	23.906	30.892	33.856	22.403	26.36	15.447	13.38	4.167		25-30	0	0	0	0	0.825	0.578	1.053	4.883	9.253	20.452	35.852	43.075	27.883	13.07	6.67	4.962	3.235
30-35	0	0	0	0	0	0	0.457	0.217	0	4.714	5.732	14.42	38.961	20.084	20.325	15.845	12.083		30-35	0	0	0	0	0.092	0.072	0.372	0.888	1.627	4.572	11.506	22.669	28.954	26.448	17.389	9.796	8.603
35-40	0	0	0	0	0	0	0	0	0	0.337	1.592	4.702	13.961	20.502	17.48	23.239	16.25		35-40	0	0	0	0	0	0	0	0.333	0.763	1.011	3.111	8.264	19.757	24.295	23.033	18.639	11.562
40-45	0	0	0	0	0	0	0	0	0	2.357	0.955	0	3.571	6.276	15.447	18.31	34.167		40-45	0	0	0	0	0	0	0	0	0.356	0.433	0.741	2.909	7.251	17.171	20.753	20.674	22.092
45-50	0	0	0	0	0	0	0	0	0	0.673	1.592	0	0.974	1.674	13.415	11.972	13.75		45-50	0	0	0	0	0	0	0	0	0.102	0.144	0.84	1.385	3.406	7.381	15.279	22.519	22.436
50-55	0	0	0	0	0	0	0	0	0	0	0	0	0.649	3.766	5.691	10.563	9.583		50-55	0	0	0	0	0	0	0	0	0	0.192	0.444	0.693	0.779	3.127	7.925	11.768	14.522
55-60	0	0	0	0	0	0	0	0	0	0	0	0	0	4.184	1.626	0.704	2.917		55-60	0	0	0	0	0	0	0	0	0	0.048	0.247	0.739	0.779	1.794	3.763	5.28	9.085
60+	0	0	0	0	0	0	0	0	0	0	0	0	0	1.255	4.065	3.873	6.667		60+	0	0	0	0	0	0	0	0	0	0	0	0.046	0.73	1.691	3.136	5.407	7.846
ART duration < 12 months, West Africa, girls																			ART duration ≥ 12 months, West Africa, girls
Weight Bands	Age (years)																		Weight Bands	Age (years)
	0.25	0.75	1	2	3	4	5	6	7	8	9	10	11	12	13	14	15			0.25	0.75	1	2	3	4	5	6	7	8	9	10	11	12	13	14	15
00-03	4.762	0	0	0	0	0	0	0	0	0	0	0	0	0	0	0	0		00-03	0	0	0	0	0	0	0	0	0	0	0	0	0	0	0	0	0
03-06	61.905	29.078	7.763	0.943	0	0	0	0	0	0	0	0	0	0	0	0	0		03-06	0	0	0.68	0	0.089	0.069	0	0	0	0	0	0	0	0	0	0	0
06-10	33.333	65.957	69.863	30.189	4.949	1.618	1.55	0.576	0	0	0	0	0	0	0	0	0		06-10	0	0	48.98	12.399	1.24	0.069	0	0.15	0.046	0	0	0	0	0	0	0	0
10-14	0	4.965	21.575	63.836	59.971	40.147	22.481	12.23	7.203	5.693	1.779	0.818	0.593	0	0	0	0		10-14	0	0	44.898	78.583	60.407	23.961	6.257	2.494	1.004	0.622	0.337	0.314	0.047	0.154	0	0	0
14-20	0	0	0.799	4.822	33.916	56.324	70.388	65.899	56.215	37.381	22.776	14.315	6.126	4.178	1.227	2.97	0		14-20	0	0	5.442	8.696	38.175	73.546	84.19	68.628	42.792	25.021	12.926	4.717	2.077	1.23	0.302	0.146	0.093
20-25	0	0	0	0.21	1.164	1.912	5.581	20	32.062	42.505	40.214	38.855	30.83	18.538	7.055	4.455	3.243		20-25	0	0	0	0.322	0.089	2.008	8.827	27.182	48.221	53.527	44.926	30.593	16.147	7.326	3.619	2.256	1.115
25-30	0	0	0	0	0	0	0	0.863	3.955	12.144	26.868	31.084	31.818	27.154	18.712	22.277	19.459		25-30	0	0	0	0	0	0.208	0.559	1.297	6.752	17.137	31.958	37.511	33.144	21.26	9.891	5.313	2.788
30-35	0	0	0	0	0	0	0	0.432	0.141	1.518	6.228	11.452	21.937	25.326	30.982	17.822	21.622		30-35	0	0	0	0	0	0.139	0.056	0.249	0.867	2.448	8	18.419	25.212	27.715	22.618	10.99	7.435
35-40	0	0	0	0	0	0	0	0	0.282	0.569	1.779	2.863	6.917	13.316	18.098	13.861	18.378		35-40	0	0	0	0	0	0	0.112	0	0.228	1.12	1.221	5.615	13.739	20.184	24.005	22.489	12.175
40-45	0	0	0	0	0	0	0	0	0.141	0.19	0.356	0.613	1.383	8.094	13.19	18.317	14.595		40-45	0	0	0	0	0	0	0	0	0.046	0	0.463	2.022	7.129	13.268	18.818	24.454	26.766
45-50	0	0	0	0	0	0	0	0	0	0	0	0	0.395	2.089	6.748	6.931	6.486		45-50	0	0	0	0	0	0	0	0	0	0.041	0	0.494	1.936	6.404	11.52	17.977	19.796
50-55	0	0	0	0	0	0	0	0	0	0	0	0	0	0.522	3.067	4.455	7.568		50-55	0	0	0	0	0	0	0	0	0.046	0.083	0.042	0.09	0.236	1.742	6.876	9.17	18.866
55-60	0	0	0	0	0	0	0	0	0	0	0	0	0	0.783	0.613	3.96	2.703		55-60	0	0	0	0	0	0	0	0	0	0	0.084	0.045	0.047	0.512	1.689	4.585	5.483
60+	0	0	0	0	0	0	0	0	0	0	0	0	0	0	0.307	4.95	5.946		60+	0	0	0	0	0	0	0	0	0	0	0.042	0.18	0.283	0.205	0.663	2.62	5.483
ART duration < 12 months, Central Africa, girls																			ART duration ≥ 12 months, Central Africa, girls
Weight Bands	Age (years)																		Weight Bands	Age (years)
	0.25	0.75	1	2	3	4	5	6	7	8	9	10	11	12	13	14	15			0.25	0.75	1	2	3	4	5	6	7	8	9	10	11	12	13	14	15
00-03	0	0	0	0	0	0	0	0	0	0	0	0	0	0	0	0	0		00-03	0	0	0	0	0	0	0	0	0	0	0	0	0	0	0	0	0
03-06	0	0	0	0	0	0	0	0	0	0	0	0	0	0	0	0	0		03-06	0	0	0	0	0	0	0	0	0	0	0	0	0	0	0	0	0
06-10	0	0	0	0	0	0	0	0	0	0	0	0	0	0	0	0	0		06-10	0	0	0	0	0	0	0	0	0	0	0	0	0	0	0	0	0
10-14	0	0	100	92.137	61.429	30.145	28.866	6.489	4.729	1.794	0	0.17	0.202	2.444	0	0.587	0		10-14	0	0	100	77.723	55.724	23.636	10.534	4.86	1.461	0.653	0.203	0.063	0	0.059	0	0	0
14-20	0	0	0	7.863	38.571	64.638	62.199	62.396	51.664	31.166	16.21	8.859	1.616	2	2.254	0	0.99		14-20	0	0	0	22.277	44.138	72.299	73.664	61.807	37.022	17.57	6.563	1.838	0.491	0.411	0	0	0
20-25	0	0	0	0	0	5.072	8.763	29.95	34.501	50	36.986	33.56	21.212	11.556	7.324	3.247	0.66		20-25	0	0	0	0	0.138	3.957	14.823	29.432	48.991	54.605	42.355	21.673	12.577	4.639	1.326	0.333	0.146
25-30	0	0	0	0	0	0.145	0.172	0.832	8.231	14.798	37.443	36.286	44.646	34.444	18.592	8.117	2.97		25-30	0	0	0	0	0	0.107	0.978	3.491	11.343	21.032	33.559	42.015	28.957	17.322	9.765	4.667	2.258
30-35	0	0	0	0	0	0	0	0	0.175	2.018	6.849	13.969	17.576	21.556	19.155	15.909	8.251		30-35	0	0	0	0	0	0	0	0.411	0.974	5.029	13.329	23.511	29.387	27.011	19.289	12.8	6.701
35-40	0	0	0	0	0	0	0	0.166	0	0	2.283	6.133	9.091	13.556	17.465	13.961	21.782		35-40	0	0	0	0	0	0	0	0	0.07	0.457	3.112	7.795	16.626	25.954	24.231	19.133	15.368
40-45	0	0	0	0	0	0	0	0	0.175	0	0.228	0.511	4.04	9.333	17.746	22.727	11.881		40-45	0	0	0	0	0	0	0	0	0.07	0.131	0.338	2.028	7.669	12.625	21.398	22.8	22.433
45-50	0	0	0	0	0	0	0	0.166	0.525	0.224	0	0	1.212	2.444	9.296	17.857	22.442		45-50	0	0	0	0	0	0	0	0	0.07	0.131	0.203	0.697	3.252	7.164	13.08	20.867	24.545
50-55	0	0	0	0	0	0	0	0	0	0	0	0.511	0.404	1.556	5.634	6.169	16.832		50-55	0	0	0	0	0	0	0	0	0	0.327	0.338	0.19	0.613	3.934	7.113	10.6	15.513
55-60	0	0	0	0	0	0	0	0	0	0	0	0	0	0.444	2.535	8.117	10.561		55-60	0	0	0	0	0	0	0	0	0	0.065	0	0.127	0.184	0.352	3.074	6	8.157
60+	0	0	0	0	0	0	0	0	0	0	0	0	0	0.667	0	3.896	3.63		60+	0	0	0	0	0	0	0	0	0	0	0	0.063	0.245	0.528	0.723	2.8	4.88
ART duration < 12 months, East Africa, girls																			ART duration ≥ 12 months, East Africa, girls
Weight Bands	Age (years)																		Weight Bands	Age (years)
	0.25	0.75	1	2	3	4	5	6	7	8	9	10	11	12	13	14	15			0.25	0.75	1	2	3	4	5	6	7	8	9	10	11	12	13	14	15
00-03	0	0	0	0	0	0	0	0	0	0	0	0	0	0	0	0	0		00-03	0	0	0	0	0	0	0	0	0	0	0	0	0	0	0	0	0
03-06	34.051	15.949	5.567	0.892	0.047	0.094	0	0	0	0	0	0	0	0	0	0	0		03-06	0	0	0.515	0.037	0.022	0.035	0	0	0	0	0	0	0	0	0	0	0
06-10	63.526	77.352	62.732	26.412	7.022	1.748	0.665	0.195	0.169	0.05	0	0	0	0	0	0	0		06-10	0	0	53.995	13.82	2.433	0.508	0.133	0.08	0.038	0	0	0	0	0	0	0	0
10-14	2.423	6.699	30.335	65.241	60.827	36.821	18.701	8.575	3.487	1.398	0.507	0.16	0.039	0.112	0.088	0.43	0		10-14	0	0	41.881	72.916	51.727	24.348	9.316	3.459	1.573	1.027	0.338	0.239	0.143	0.08	0.053	0.019	0.023
14-20	0	0	1.366	7.295	31.447	58.337	71.57	68.234	49.613	33.417	17.507	6.468	3.948	2.618	0.569	0.484	0.233		14-20	0	0	3.608	13.19	45.166	71.259	78.562	65.465	41.532	20.719	10.352	4.404	1.186	0.788	0.755	0.175	0.254
20-25	0	0	0	0.16	0.564	2.598	8.697	21.169	42.252	51.71	53.027	42.811	24.358	12.827	7.881	4.194	2.503		20-25	0	0	0	0.037	0.587	3.658	11.206	28.492	48.67	57.849	47.788	31.162	17.886	8.603	3.303	1.788	0.739
25-30	0	0	0	0	0.047	0.26	0.321	1.583	4.068	11.779	24.008	35.767	41.848	34.555	24.694	12.796	8.265		25-30	0	0	0	0	0.065	0.158	0.723	2.306	7.355	18.215	35.155	45.092	40.886	31.018	18.324	9.969	4.825
30-35	0	0	0	0	0.047	0.142	0	0.097	0.339	1.348	3.489	10.183	19.503	27.45	27.583	25.215	17.404		30-35	0	0	0	0	0	0	0.059	0.172	0.704	1.678	5.414	15.428	27.557	30.326	29.287	22.075	13.296
35-40	0	0	0	0	0	0	0.023	0	0.073	0.2	1.044	2.754	6.198	13.762	19.002	19.624	14.377		35-40	0	0	0	0	0	0.035	0	0.027	0.077	0.413	0.777	2.958	9.071	17.591	22.874	25.651	21.722
40-45	0	0	0	0	0	0	0.023	0.146	0	0.075	0.388	1.057	1.816	3.815	10.508	16.559	16.065		40-45	0	0	0	0	0	0	0	0	0	0	0.138	0.425	2.243	7.622	14.23	19.53	23.73
45-50	0	0	0	0	0	0	0	0	0	0	0.03	0.256	1.619	2.393	4.072	9.57	14.843		45-50	0	0	0	0	0	0	0	0	0	0.013	0.025	0.226	0.529	2.541	6.641	11.426	16.736
50-55	0	0	0	0	0	0	0	0	0	0.025	0	0.064	0.237	1.346	2.496	5.43	10.768		50-55	0	0	0	0	0	0	0	0	0.026	0.075	0.013	0.053	0.157	0.691	2.881	5.733	10.619
55-60	0	0	0	0	0	0	0	0	0	0	0	0.096	0.118	0.711	1.751	2.043	8.324		55-60	0	0	0	0	0	0	0	0	0.026	0.013	0	0	0.157	0.225	0.791	2.449	4.501
60+	0	0	0	0	0	0	0	0	0	0	0	0.384	0.316	0.411	1.357	3.656	7.218		60+	0	0	0	0	0	0	0	0	0	0	0	0.013	0.186	0.515	0.861	1.185	3.555
ART duration < 12 months, Southern Africa, girls																			ART duration ≥ 12 months, Southern Africa, girls
Weight Bands	Age (years)																		Weight Bands	Age (years)
	0.25	0.75	1	2	3	4	5	6	7	8	9	10	11	12	13	14	15			0.25	0.75	1	2	3	4	5	6	7	8	9	10	11	12	13	14	15
00-03	1.43	0	0.021	0	0	0	0	0	0	0	0	0	0	0	0	0	0		00-03	0	0	0	0	0	0	0	0	0	0	0	0	0	0	0	0	0
03-06	48.337	17.038	4.193	0.192	0.032	0.051	0	0	0	0	0	0	0	0	0	0	0		03-06	0	0	0.528	0.198	0.112	0	0	0	0	0	0	0	0	0	0	0	0
06-10	49.271	76.204	66.95	25.216	5.623	1.396	0.751	0.211	0.067	0	0	0	0	0	0	0	0		06-10	0	0	43.75	13.113	2.168	0.501	0.081	0.055	0.023	0	0	0	0	0	0	0	0
10-14	0.962	6.758	27.873	67.155	62.744	33.543	15.176	8.517	3.953	1.542	0.642	0.354	0.259	0.206	0.166	0	0.029		10-14	0	0	52.465	73.18	53.633	24.228	8.233	2.864	0.928	0.326	0.132	0.069	0.103	0.12	0.05	0.15	0.058
14-20	0	0	0.964	7.282	30.588	62.849	75.606	68.309	49.233	31.492	16.161	7.046	4.161	1.83	1.493	0.864	0.38		14-20	0	0	3.257	13.158	43.059	71.612	77.886	61.481	36.417	17.362	6.99	2.589	1.03	0.386	0.243	0.292	0.136
20-25	0	0	0	0.156	0.871	1.906	7.426	20.904	39.193	49.898	49.228	37.95	22.238	11.714	8.15	2.567	1.607		20-25	0	0	0	0.351	0.896	3.324	12.677	32.2	51.859	53.863	43.026	26.969	13.807	6.169	2.744	1.431	0.826
25-30	0	0	0	0	0.127	0.238	0.785	1.672	6.571	14.424	26.374	34.874	36.074	28.049	19.498	12.023	6.193		25-30	0	0	0	0	0.122	0.273	0.897	2.896	9.089	23.472	36.502	41.037	33.238	22.153	11.318	5.265	2.584
30-35	0	0	0	0	0.016	0.017	0.119	0.176	0.6	2.034	5.514	13.998	23.83	30.634	24.615	19.573	12.065		30-35	0	0	0	0	0.01	0.053	0.113	0.323	1.216	3.75	9.778	20.246	29.159	28.297	21.638	13.684	8.606
35-40	0	0	0	0	0	0	0.137	0.106	0.133	0.373	1.11	3.709	8.76	17.09	20.09	19.217	17.324		35-40	0	0	0	0	0	0.009	0.089	0.142	0.32	0.73	2.493	5.978	13.379	20.859	22.879	19.956	14.502
40-45	0	0	0	0	0	0	0	0.053	0.1	0.051	0.572	1.379	2.608	5.674	13.006	19.548	20.129		40-45	0	0	0	0	0	0	0.024	0.024	0.094	0.248	0.567	2.113	6.06	13.036	21.017	23.746	22.263
45-50	0	0	0	0	0	0	0	0.053	0.033	0	0.017	0.317	1.015	3.157	7.605	13.599	16.857		45-50	0	0	0	0	0	0	0	0.016	0.023	0.14	0.194	0.484	2.099	5.133	11.1	17.774	22.224
50-55	0	0	0	0	0	0	0	0	0.083	0.051	0.087	0.075	0.657	1.03	2.369	7.092	13		50-55	0	0	0	0	0	0	0	0	0.023	0.07	0.148	0.115	0.57	2.522	5.412	9.814	15.668
55-60	0	0	0	0	0	0	0	0	0.033	0.068	0.156	0.037	0.119	0.252	1.421	2.389	6.748		55-60	0	0	0	0	0	0	0	0	0.008	0.016	0.085	0.154	0.23	0.755	2.24	4.814	7.12
60+	0	0	0	0	0	0	0	0	0	0.068	0.139	0.261	0.279	0.366	1.587	3.127	5.668		60+	0	0	0	0	0	0	0	0	0	0.023	0.085	0.246	0.325	0.57	1.359	3.074	6.013

## Sheet: 9-Regions, ART dur, <2013,boys
Weight-for-age distributions among children with HIV on antiretroviral therapy in the International Epidemiology to evaluate AIDS (IeDEA) multiregional consortium
ART duration < 12 months, Asia-pacific, boys, visit<2013																			ART duration ≥ 12 months, Asia-pacific, boys, visit<2013
Weight Bands	Age (years)																		Weight Bands	Age (years)
	0.25	0.75	1	2	3	4	5	6	7	8	9	10	11	12	13	14	15			0.25	0.75	1	2	3	4	5	6	7	8	9	10	11	12	13	14	15
00-03	0	0	0	0	0	0	0	0	0	0	0	0	0	0	0	0	0		00-03	0	0	0	0	0	0	0	0	0	0	0	0	0	0	0	0	0
03-06	37.5	4.819	2.685	0	0	0	0	0	0	0	0	0	0	0	0	0	0		03-06	0	0	0	0.151	0	0	0	0	0	0	0	0	0	0	0	0	0
06-10	60.185	84.337	54.348	14.407	3.939	1.303	1.366	0	0	0	0	0	0	0	0	0	0		06-10	0	0	29.717	5.598	0.765	0.294	0	0	0	0	0	0	0	0	0	0	0
10-14	2.315	10.843	42.455	74.576	63.939	38.662	19.958	11.857	6.885	0.686	0.969	1.111	0	0.407	0	0	0		10-14	0	0	66.981	72.769	49.278	22.679	8.127	4.673	1.469	0.317	0.125	0	0	0	0	0	0
14-20	0	0	0.512	11.017	31.414	58.21	70.798	74.711	68.51	51.44	32.558	18.333	3.438	1.22	2.857	0	0		14-20	0	0	3.302	21.483	49.533	71.68	75.574	65.643	50.525	32.409	14.375	6.477	1.731	0.336	0.131	0	0
20-25	0	0	0	0	0.707	1.651	7.038	10.913	21.219	41.152	56.395	50.556	30.313	18.293	15	4.673	4.651		20-25	0	0	0	0	0.34	4.759	13.958	23.107	36.131	49.01	56.75	45.563	29.423	14.334	4.578	1.538	0.33
25-30	0	0	0	0	0	0.174	0.525	1.889	2.709	5.35	6.977	21.944	33.125	37.398	28.571	8.411	4.651		25-30	0	0	0	0	0.085	0.588	2.112	5.149	8.938	12.401	19.917	32.609	43.125	39.474	25.18	9.636	2.527
30-35	0	0	0	0	0	0	0.315	0.63	0.339	0.823	1.55	5.833	19.375	23.984	32.857	28.037	4.651		30-35	0	0	0	0	0	0	0.23	1.255	2.182	4.081	5.208	9.45	14.663	25.196	29.431	19.757	9.56
35-40	0	0	0	0	0	0	0	0	0.113	0.549	1.55	1.944	7.5	6.911	10.714	29.907	20.93		35-40	0	0	0	0	0	0	0	0.173	0.755	1.149	2.292	2.884	6.01	10.638	18.705	22.753	20.22
40-45	0	0	0	0	0	0	0	0	0.226	0	0	0	2.188	6.098	3.571	19.626	34.884		40-45	0	0	0	0	0	0	0	0	0	0.555	1.292	1.775	2.885	5.655	10.072	22.105	22.637
45-50	0	0	0	0	0	0	0	0	0	0	0	0.278	1.25	3.252	1.429	5.607	18.605		45-50	0	0	0	0	0	0	0	0	0	0.079	0.042	0.71	1.587	1.96	4.055	11.903	22.418
50-55	0	0	0	0	0	0	0	0	0	0	0	0	2.188	0	1.429	0.935	4.651		50-55	0	0	0	0	0	0	0	0	0	0	0	0.488	0.24	1.288	3.139	5.506	11.429
55-60	0	0	0	0	0	0	0	0	0	0	0	0	0.625	1.626	0.714	1.869	2.326		55-60	0	0	0	0	0	0	0	0	0	0	0	0.044	0.192	0.672	2.747	2.267	5.275
60+	0	0	0	0	0	0	0	0	0	0	0	0	0	0.813	2.857	0.935	4.651		60+	0	0	0	0	0	0	0	0	0	0	0	0	0.144	0.448	1.962	4.534	5.604
ART duration < 12 months, CCASANet, boys, visit<2013																			ART duration ≥ 12 months, CCASANet, boys, visit<2013
Weight Bands	Age (years)																		Weight Bands	Age (years)
	0.25	0.75	1	2	3	4	5	6	7	8	9	10	11	12	13	14	15			0.25	0.75	1	2	3	4	5	6	7	8	9	10	11	12	13	14	15
00-03	1.389	0	0	0	0	0	0	0	0	0	0	0	0	0	0	0	0		00-03	0	0	0	0	0	0	0	0	0	0	0	0	0	0	0	0	0
03-06	49.537	16.185	2.845	0.719	0	0	0	0	0	0	0	0	0	0	0	0	0		03-06	0	0	2.516	0	0	0	0	0	0	0	0	0	0	0	0	0	0
06-10	49.074	81.503	55.192	10.612	1.542	1.524	0.233	0	0	0	0	0	0	0	0	0	0		06-10	0	0	45.283	5.057	0.468	0.274	0	0	0	0	0	0	0	0	0	0	0
10-14	0	2.312	40.256	75.54	44.273	22.476	10.023	1.061	0.926	0.755	0	0	0	0	0	0	0		10-14	0	0	51.572	74.225	41.569	11.792	3.723	0.34	0	0.123	0.061	0.124	0	0	0	0	0
14-20	0	0	1.707	13.129	54.185	74.667	72.494	58.355	39.198	21.887	12.741	8.088	4.867	2.429	0.392	1.19	0.685		14-20	0	0	0.629	20.718	57.026	84.095	78.467	50.679	26.433	11.963	3.856	2.36	1.726	0.984	0.22	0.424	0
20-25	0	0	0	0	0	1.143	14.452	35.809	51.543	60	43.629	36.029	15.929	10.931	16.471	12.698	12.329		20-25	0	0	0	0	0.937	3.839	17.226	43.614	56.369	50.92	36.353	20.062	11.961	6.817	5.783	3.644	2.392
25-30	0	0	0	0	0	0.19	2.797	3.448	6.173	13.585	36.293	33.456	41.15	29.555	28.627	14.286	10.959		25-30	0	0	0	0	0	0	0.584	4.552	14.777	30.552	42.228	42.236	32.244	22.558	12.518	7.119	4.692
30-35	0	0	0	0	0	0	0	1.326	1.543	1.509	5.792	19.118	33.186	23.887	30.588	24.206	22.603		30-35	0	0	0	0	0	0	0	0.476	1.529	3.313	11.873	23.292	34.649	33.802	28.038	16.271	13.891
35-40	0	0	0	0	0	0	0	0	0.617	0	1.544	3.309	4.867	24.696	16.078	19.841	23.288		35-40	0	0	0	0	0	0	0	0.34	0.828	1.718	2.57	6.832	11.159	20.028	24.085	23.475	15.455
40-45	0	0	0	0	0	0	0	0	0	0.377	0	0	0	7.692	4.706	18.651	15.753		40-45	0	0	0	0	0	0	0	0	0.064	1.288	1.652	2.484	3.699	8.152	14.422	23.136	18.491
45-50	0	0	0	0	0	0	0	0	0	1.132	0	0	0	0.81	1.961	5.556	6.164		45-50	0	0	0	0	0	0	0	0	0	0.123	1.04	1.739	2.343	3.022	6.955	13.39	20.515
50-55	0	0	0	0	0	0	0	0	0	0.755	0	0	0	0	0	1.984	5.479		50-55	0	0	0	0	0	0	0	0	0	0	0.245	0.559	1.295	1.687	3.001	5.169	12.328
55-60	0	0	0	0	0	0	0	0	0	0	0	0	0	0	1.176	1.587	1.37		55-60	0	0	0	0	0	0	0	0	0	0	0.122	0.186	0.432	1.687	1.903	3.475	6.256
60+	0	0	0	0	0	0	0	0	0	0	0	0	0	0	0	0	1.37		60+	0	0	0	0	0	0	0	0	0	0	0	0.124	0.493	1.265	3.075	3.898	5.98
ART duration < 12 months, West Africa, boys, visit<2013																			ART duration ≥ 12 months, West Africa, boys, visit<2013
Weight Bands	Age (years)																		Weight Bands	Age (years)
	0.25	0.75	1	2	3	4	5	6	7	8	9	10	11	12	13	14	15			0.25	0.75	1	2	3	4	5	6	7	8	9	10	11	12	13	14	15
00-03	0	0	0	0	0	0	0	0	0	0	0	0	0	0	0	0	0		00-03	0	0	0	0	0	0	0	0	0	0	0	0	0	0	0	0	0
03-06	55.932	27.857	6.25	0.408	0	0	0	0	0	0	0	0	0	0	0	0	0		03-06	0	0	1.22	0.18	0.067	0	0	0	0	0	0	0	0	0	0	0	0
06-10	41.525	70	63.039	27.523	7.378	2.212	1.452	0.157	0	0	0	0	0	0	0	0	0		06-10	0	0	28.049	9.874	1.21	0.719	0.071	0	0	0	0	0	0	0	0	0	0
10-14	2.542	2.143	29.526	65.545	58.63	31.268	20.484	8.948	3.175	4.244	1.055	1.813	0	0.395	0	0	0		10-14	0	0	68.293	72.531	52.7	24.221	7.249	2.761	0.788	0.138	0.224	0.314	0.357	0.112	0.281	0.166	0
14-20	0	0	1.078	6.524	33.729	64.159	71.129	70.801	58.377	34.502	17.722	17.358	6.102	6.324	5.525	0.658	0		14-20	0	0	2.439	17.235	45.065	71.863	80.455	64.175	38.214	15.975	6.358	2.278	0.714	0.787	1.547	1.498	0.21
20-25	0	0	0.108	0	0.264	2.212	6.613	19.309	33.51	48.708	50.211	34.456	32.542	25.296	7.735	9.868	5.405		20-25	0	0	0	0.18	0.931	2.878	11.94	30.909	53.185	60.443	48.542	31.422	19.911	11.024	6.048	2.829	2.516
25-30	0	0	0	0	0	0.147	0.323	0.628	4.586	10.886	26.16	32.383	43.729	30.435	35.359	30.263	17.568		25-30	0	0	0	0	0.093	0.32	0.284	2.02	6.829	20.609	36.948	45.09	42.232	35.883	23.488	16.14	8.176
30-35	0	0	0	0	0	0	0	0.157	0.353	1.107	3.586	10.104	10.847	27.273	28.177	29.605	37.838		30-35	0	0	0	0	0	0	0	0	0.788	2.282	6.208	16.732	25.625	32.283	35.584	26.789	32.914
35-40	0	0	0	0	0	0	0	0	0	0.554	1.266	3.109	5.085	8.3	15.47	17.105	20.27		35-40	0	0	0	0	0	0	0	0.135	0.197	0.484	0.823	2.907	7.946	11.136	19.269	22.962	14.465
40-45	0	0	0	0	0	0	0	0	0	0	0	0.777	1.356	1.976	7.182	6.579	8.108		40-45	0	0	0	0	0	0	0	0	0	0.069	0.449	0.864	2.321	5.737	5.907	17.304	19.078
45-50	0	0	0	0	0	0	0	0	0	0	0	0	0.339	0	0.552	3.947	6.757		45-50	0	0	0	0	0	0	0	0	0	0	0.299	0.314	0.804	1.912	5.345	5.99	12.369
50-55	0	0	0	0	0	0	0	0	0	0	0	0	0	0	0	1.974	0		50-55	0	0	0	0	0	0	0	0	0	0	0.075	0.079	0	0.675	1.406	4.825	5.241
55-60	0	0	0	0	0	0	0	0	0	0	0	0	0	0	0	0	4.054		55-60	0	0	0	0	0	0	0	0	0	0	0	0	0	0.225	0.844	1.331	3.145
60+	0	0	0	0	0	0	0	0	0	0	0	0	0	0	0	0	0		60+	0	0	0	0	0	0	0	0	0	0	0.075	0	0.089	0.225	0.281	0.166	1.887
ART duration < 12 months, Central Africa, boys, visit<2013																			ART duration ≥ 12 months, Central Africa, boys, visit<2013
Weight Bands	Age (years)																		Weight Bands	Age (years)
	0.25	0.75	1	2	3	4	5	6	7	8	9	10	11	12	13	14	15			0.25	0.75	1	2	3	4	5	6	7	8	9	10	11	12	13	14	15
00-03	0	0	0	0	0	0	0	0	0	0	0	0	0	0	0	0	0		00-03	0	0	0	0	0	0	0	0	0	0	0	0	0	0	0	0	0
03-06	0	0	0	0	0	0	0	0	0	0	0	0	0	0	0	0	0		03-06	0	0	0	0	0	0	0	0	0	0	0	0	0	0	0	0	0
06-10	0	0	0	0	0	0	0	0	0	0	0	0	0	0	0	0	0		06-10	0	0	0	0	0	0	0	0	0	0	0	0	0	0	0	0	0
10-14	0	0	97.59	86.039	58.893	26.094	14.607	6.888	3.441	0.196	0	0	0	0.248	0	0.722	0		10-14	0	0	100	76.316	49.564	16.899	5.955	5.491	0.367	0.51	0.255	0	0	0	0	0	0
14-20	0	0	2.41	13.809	40.94	71.717	77.753	55.867	45.344	18.824	13.333	7.389	3.591	4.467	0.968	2.888	0		14-20	0	0	0	23.684	49.938	79.878	80.066	61.116	32.081	13.605	5.867	2.341	0.345	0.091	0.551	0	0.109
20-25	0	0	0	0.152	0.168	2.189	7.416	33.163	45.749	63.137	55.172	35.714	27.072	15.881	11.613	9.025	3.153		20-25	0	0	0	0	0.498	3.223	13.73	31.683	56.92	55.102	39.711	26.312	12.845	6.267	3.493	1.865	2.726
25-30	0	0	0	0	0	0	0.225	4.082	5.263	15.882	29.195	42.118	38.398	40.943	24.839	17.329	15.315		25-30	0	0	0	0	0	0	0.248	1.62	10.174	28.316	45.493	50.767	43.017	27.793	12.316	8.29	5.344
30-35	0	0	0	0	0	0	0	0	0	0.588	2.069	14.286	22.099	29.032	34.194	25.632	27.928		30-35	0	0	0	0	0	0	0	0.09	0.367	2.211	7.993	19.128	34.569	42.779	38.327	20.104	11.778
35-40	0	0	0	0	0	0	0	0	0.202	0.392	0.23	0.246	8.84	6.7	21.613	20.217	18.919		35-40	0	0	0	0	0	0	0	0	0	0.255	0.68	1.453	8.448	18.165	26.838	27.254	21.919
40-45	0	0	0	0	0	0	0	0	0	0	0	0.246	0	1.985	5.484	19.856	17.117		40-45	0	0	0	0	0	0	0	0	0.092	0	0	0	0.431	3.179	11.121	22.694	19.847
45-50	0	0	0	0	0	0	0	0	0	0	0	0	0	0.744	1.29	4.332	6.757		45-50	0	0	0	0	0	0	0	0	0	0	0	0	0.345	0.908	4.688	13.782	20.065
50-55	0	0	0	0	0	0	0	0	0	0	0	0	0	0	0	0	6.757		50-55	0	0	0	0	0	0	0	0	0	0	0	0	0	0.636	1.103	4.974	11.559
55-60	0	0	0	0	0	0	0	0	0	0.98	0	0	0	0	0	0	1.802		55-60	0	0	0	0	0	0	0	0	0	0	0	0	0	0.182	1.103	0.725	4.362
60+	0	0	0	0	0	0	0	0	0	0	0	0	0	0	0	0	2.252		60+	0	0	0	0	0	0	0	0	0	0	0	0	0	0	0.46	0.311	2.29
ART duration < 12 months, East Africa, boys, visit<2013																			ART duration ≥ 12 months, East Africa, boys, visit<2013
Weight Bands	Age (years)																		Weight Bands	Age (years)
	0.25	0.75	1	2	3	4	5	6	7	8	9	10	11	12	13	14	15			0.25	0.75	1	2	3	4	5	6	7	8	9	10	11	12	13	14	15
00-03	0.494	0	0	0	0	0	0	0	0	0	0	0	0	0	0	0	0		00-03	0	0	0	0	0	0	0	0	0	0	0	0	0	0	0	0	0
03-06	27.018	15.157	4.596	0.87	0.024	0.026	0	0	0	0	0	0	0	0	0	0	0		03-06	0	0	1.576	0.049	0.075	0.058	0	0	0	0	0	0	0	0	0	0	0
06-10	69.522	76.307	58.687	22.195	6.085	1.484	0.736	0.204	0	0	0	0	0	0	0	0	0		06-10	0	0	47.636	12.709	2.589	0.865	0.188	0	0	0	0	0	0	0	0	0	0
10-14	2.965	8.537	34.501	64.969	54.025	30.286	13.071	5.499	2.714	1.362	0.321	0.878	0.415	0.452	0.838	0.14	0		10-14	0	0	48.687	66.897	42.448	19.47	7.245	3.211	0.92	0.745	0.289	0.131	0.02	0.086	0	0.028	0
14-20	0	0	2.216	11.698	39.339	65.026	76.751	67.413	50.746	31.654	15.774	7.579	5.39	2.408	0.726	1.258	0.664		14-20	0	0	2.102	19.803	53.556	74.246	79.46	62.591	37.749	18.709	9.395	4.107	1.785	1.552	0.453	0.367	0.475
20-25	0	0	0	0.269	0.431	2.839	8.401	24.389	39.864	48.542	47.716	37.176	29.643	14.15	11.334	7.058	3.412		20-25	0	0	0	0.542	1.156	4.939	12.355	31.098	51.395	57.198	47.859	31.286	20.645	12.804	7.481	3.694	1.356
25-30	0	0	0	0	0.096	0.339	1.015	2.266	6.323	16.255	29.657	38.652	41.75	42.649	29.313	25.926	16.682		25-30	0	0	0	0	0.176	0.404	0.649	2.642	8.924	20.338	33.418	44.391	44.068	35.008	24.811	18.697	12.614
30-35	0	0	0	0	0	0	0.025	0.153	0.271	1.965	5.532	13.482	17.579	24.737	34.506	32.355	28.057		30-35	0	0	0	0	0	0.019	0.085	0.395	0.797	2.56	7.628	16.39	23.241	32.076	38.741	32.685	23.364
35-40	0	0	0	0	0	0	0	0.051	0.081	0.222	0.928	1.955	4.643	12.544	16.136	20.475	21.706		35-40	0	0	0	0	0	0	0.017	0.063	0.215	0.434	1.104	3.005	8.599	13.063	16.448	24.901	27.331
40-45	0	0	0	0	0	0	0	0.025	0	0	0	0.279	0.539	2.659	4.802	8.526	15.355		40-45	0	0	0	0	0	0	0	0	0	0.016	0.085	0.187	0.973	4.203	7.683	11.985	18.074
45-50	0	0	0	0	0	0	0	0	0	0	0	0	0	0.401	1.117	1.468	7.678		45-50	0	0	0	0	0	0	0	0	0	0	0.119	0.131	0.122	0.625	2.922	4.992	8.647
50-55	0	0	0	0	0	0	0	0	0	0	0	0	0	0	0.558	1.537	3.981		50-55	0	0	0	0	0	0	0	0	0	0	0	0.093	0.122	0.108	0.882	1.918	5.222
55-60	0	0	0	0	0	0	0	0	0	0	0	0	0	0	0.168	0.908	2.275		55-60	0	0	0	0	0	0	0	0	0	0	0	0.056	0.243	0.237	0.428	0.367	1.967
60+	0	0	0	0	0	0	0	0	0	0	0.071	0	0.041	0	0.503	0.349	0.19		60+	0	0	0	0	0	0	0	0	0	0	0.102	0.224	0.183	0.237	0.151	0.367	0.949
ART duration < 12 months, Southern Africa, boys, visit<2013																			ART duration ≥ 12 months, Southern Africa, boys, visit<2013
Weight Bands	Age (years)																		Weight Bands	Age (years)
	0.25	0.75	1	2	3	4	5	6	7	8	9	10	11	12	13	14	15			0.25	0.75	1	2	3	4	5	6	7	8	9	10	11	12	13	14	15
00-03	1.4	0.043	0	0	0	0	0	0	0	0	0	0	0	0	0	0	0		00-03	0	0	0	0	0	0	0	0	0	0	0	0	0	0	0	0	0
03-06	43.448	12.817	2.614	0.286	0.017	0.019	0	0	0	0	0	0	0	0	0	0	0		03-06	0	0	0.314	0.058	0	0	0	0	0	0	0	0	0	0	0	0	0
06-10	52.918	77.632	58.993	18.83	3.987	1.395	0.448	0.138	0	0	0	0	0	0	0	0	0		06-10	0	0	31.835	8.701	1.198	0.255	0.067	0.054	0	0	0	0	0	0	0	0	0
10-14	2.234	9.552	36.706	68.96	52.804	30.5	14.97	5.853	2.693	0.893	0.475	0.49	0.512	0.171	0.267	0	0.047		10-14	0	0	64.088	70.183	44.855	16.553	5.288	1.627	0.697	0.286	0.111	0.103	0.095	0.077	0.028	0.016	0.055
14-20	0	0	1.674	11.769	42.845	64.72	72.535	65.077	46.645	26.132	14.386	7.578	3.814	2.999	1.134	0.752	0.516		14-20	0	0	3.764	20.635	52.735	78.654	78.029	58.815	33.457	14.625	5.378	2.132	1.171	0.796	0.655	0.39	0.238
20-25	0	0	0.012	0.156	0.331	3.05	11.402	26.705	44.988	54.667	52.432	34.973	27.555	15.967	8.973	5.857	4.315		20-25	0	0	0	0.423	0.977	4.364	15.797	36.14	54.6	57.961	45.371	27.018	14.183	8.462	5.032	2.619	1.685
25-30	0	0	0	0	0.017	0.279	0.52	1.833	4.992	16.521	27.437	42.691	42.243	37.446	25.951	22.715	13.274		25-30	0	0	0	0	0.234	0.163	0.617	2.853	10.191	23.569	39.284	49.373	44.784	31.356	19.501	11.646	7.473
30-35	0	0	0	0	0	0.037	0.054	0.158	0.249	1.446	4.524	12.311	20.353	28.877	34.79	29.917	28.987		30-35	0	0	0	0	0	0.012	0.123	0.304	0.653	2.901	7.939	16.598	29.607	36.492	35.378	26.692	17.509
35-40	0	0	0	0	0	0	0.072	0.177	0.062	0.234	0.475	1.609	3.672	9.854	16.711	19.549	23.358		35-40	0	0	0	0	0	0	0.079	0.206	0.25	0.33	1.319	3.42	7.405	15.973	22.261	26.084	21.923
40-45	0	0	0	0	0	0	0	0.059	0.062	0.064	0.181	0.303	1.252	2.999	6.571	11.08	12.992		40-45	0	0	0	0	0	0	0	0	0.098	0.132	0.177	0.901	1.715	4.674	10.664	16.23	20.256
45-50	0	0	0	0	0	0	0	0	0.207	0	0.023	0.023	0.256	0.771	3.702	4.67	7.88		45-50	0	0	0	0	0	0	0	0	0.033	0.121	0.078	0.182	0.627	1.194	4.307	9.339	15.201
50-55	0	0	0	0	0	0	0	0	0.104	0.043	0.068	0.023	0.142	0.486	0.834	2.77	4.972		50-55	0	0	0	0	0	0	0	0	0.022	0.044	0.078	0.057	0.237	0.514	1.157	4.537	8.81
55-60	0	0	0	0	0	0	0	0	0	0	0	0	0	0.171	0.2	1.187	1.829		55-60	0	0	0	0	0	0	0	0	0	0.022	0.122	0.08	0.059	0.282	0.516	1.543	4.231
60+	0	0	0	0	0	0	0	0	0	0	0	0	0.199	0.257	0.867	1.504	1.829		60+	0	0	0	0	0	0	0	0	0	0.011	0.144	0.137	0.118	0.18	0.502	0.904	2.619

[truncated: 3 more sheets: 10-Reg, ART dur, <2013,Girls, 11-Reg, ART dur, >=2013,Boys, 12-Reg, ART dur, >=2013,Girls]
